# Supplementary material for: Metal triflate promoted synthesis of naphthalenes
Source: Royal Society of Chemistry journal article supplement (doi:10.1039/c7ra04960a), 2017-01-01
Supplement: c7ra04960a1.pdf [file c7ra04960a1.pdf]

## Supporting Information

### Metal Triflates Promoted Synthesis of Naphthalenes

Chieh-Kai Chan, Heui-Sin Wang, Yu-Lin Tsai and Meng-Yang Chang\*

Department of Medicinal and Applied Chemistry, Kaohsiung Medical University Hospital, Kaohsiung Medical University, Kaohsiung 807, Taiwan

Email: [mychang@kmu.edu.tw](mailto:mychang@kmu.edu.tw)

- (1) Additional scanned photocopies (pages S-2~S-27)
- (2) X-ray crystal data of **5e**, **5f**, **8d**, **8g**, **9a** and **9b** (pages S-28~S-33)

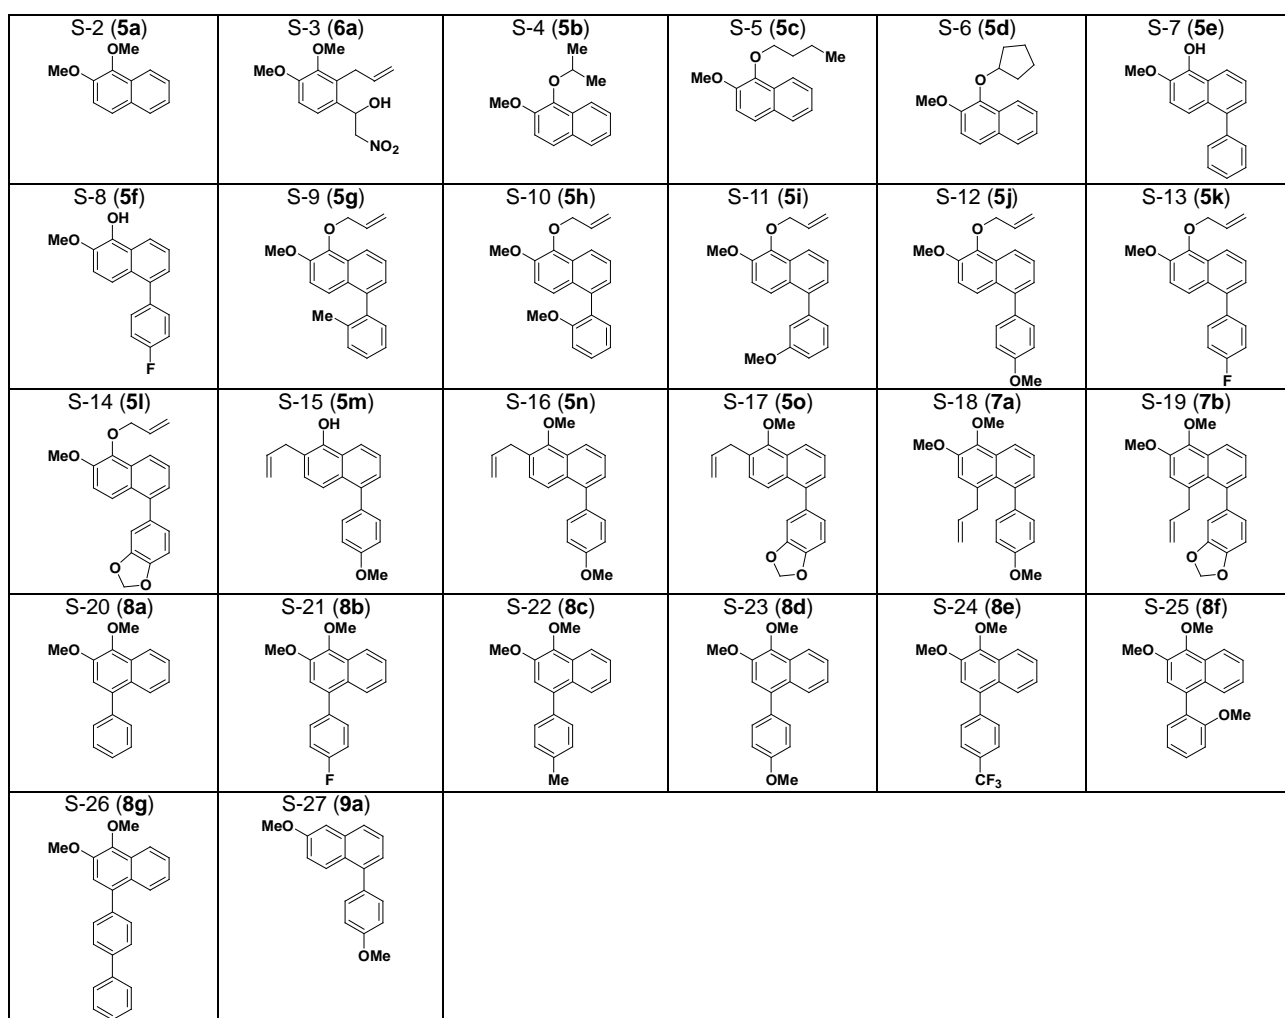

# Compound 5a

SS1041230  
Pulse Sequence: s2pul  
UNITYplus-400 "unity400"  
Date: Dec 31 2015  
Solvent: CDCl3  
Ambient temperature  
Total 26 repetitions

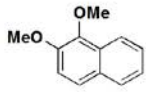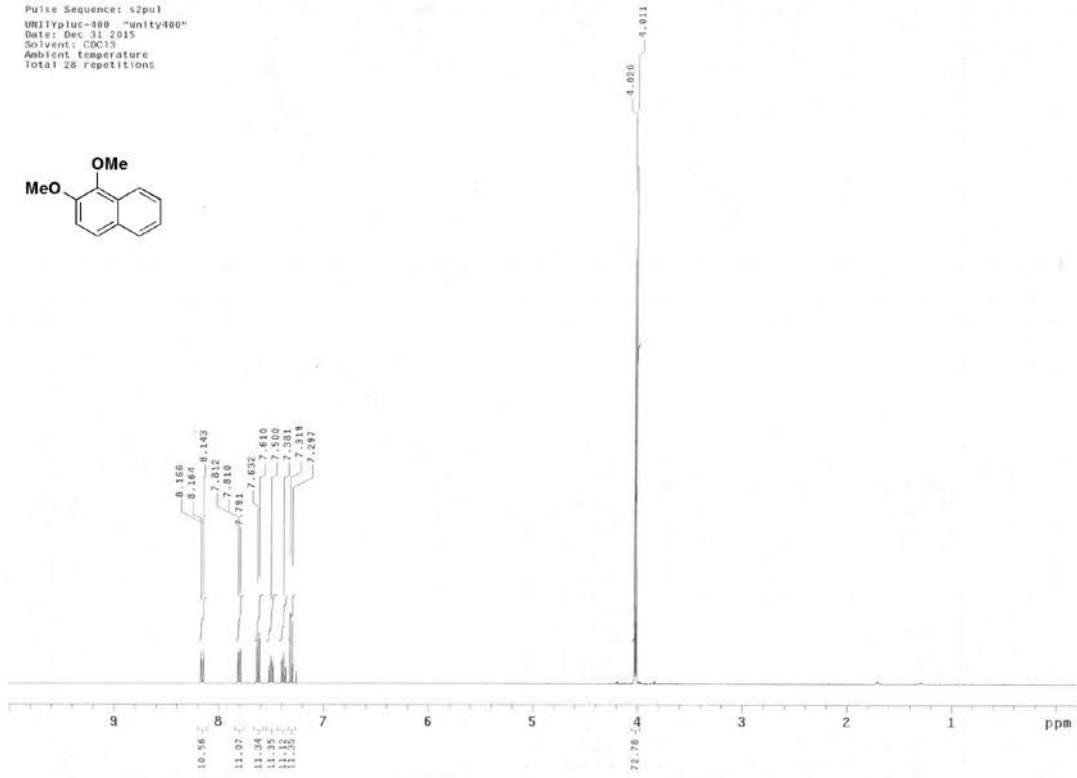

SS1041230  
Pulse Sequence: s2pul  
UNITYplus-400 "unity400"  
Date: Dec 31 2015  
Solvent: CDCl3  
Ambient temperature  
Total 1136 repetitions

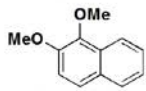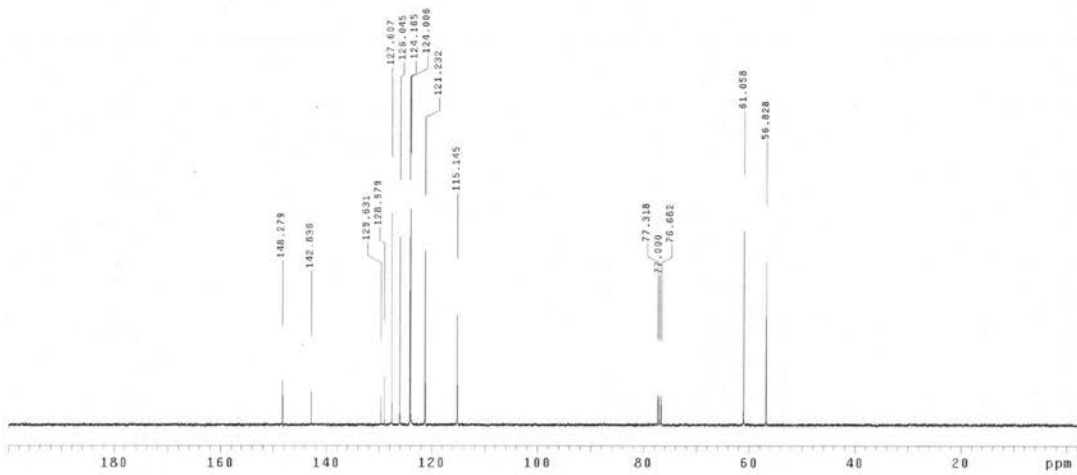

# Compound 6a

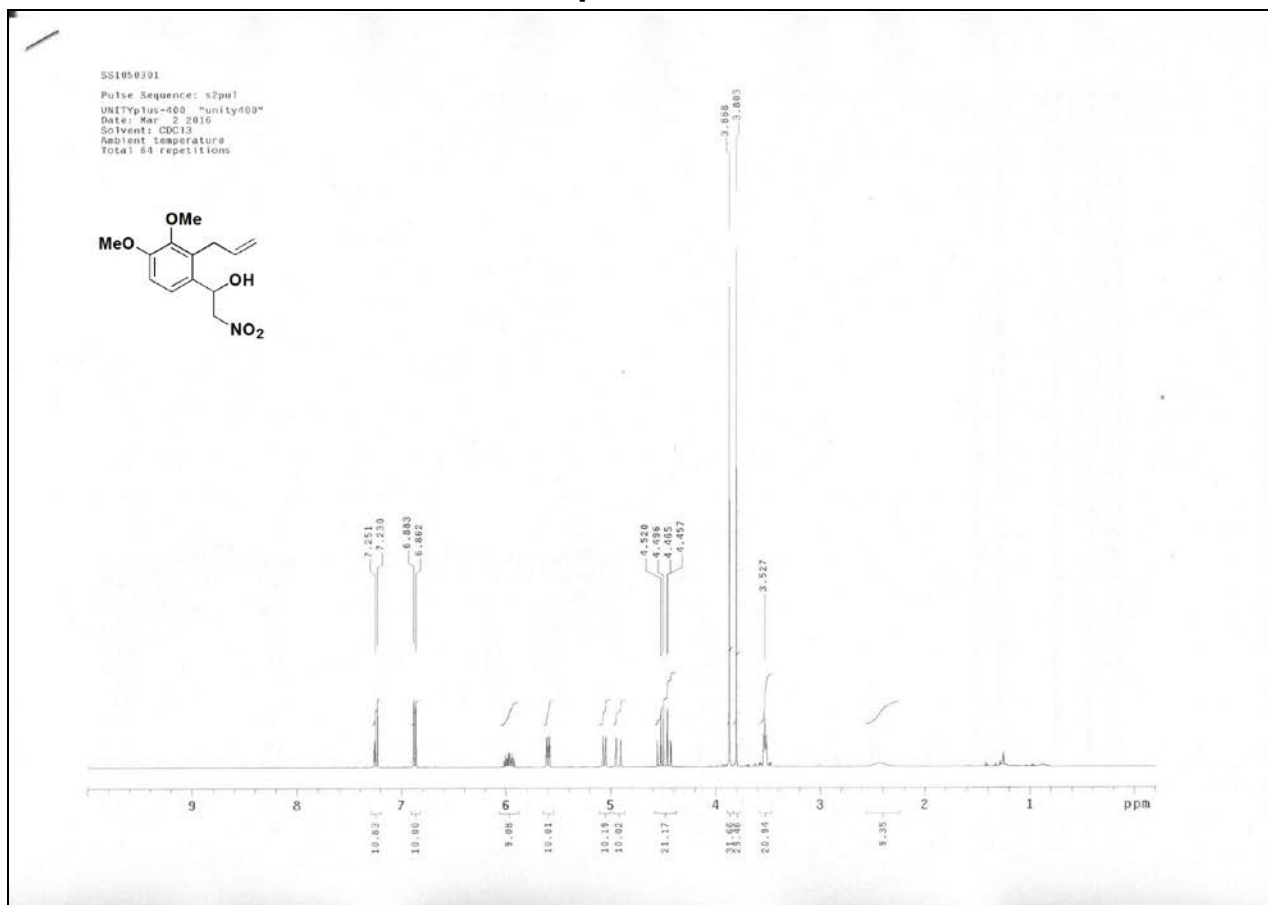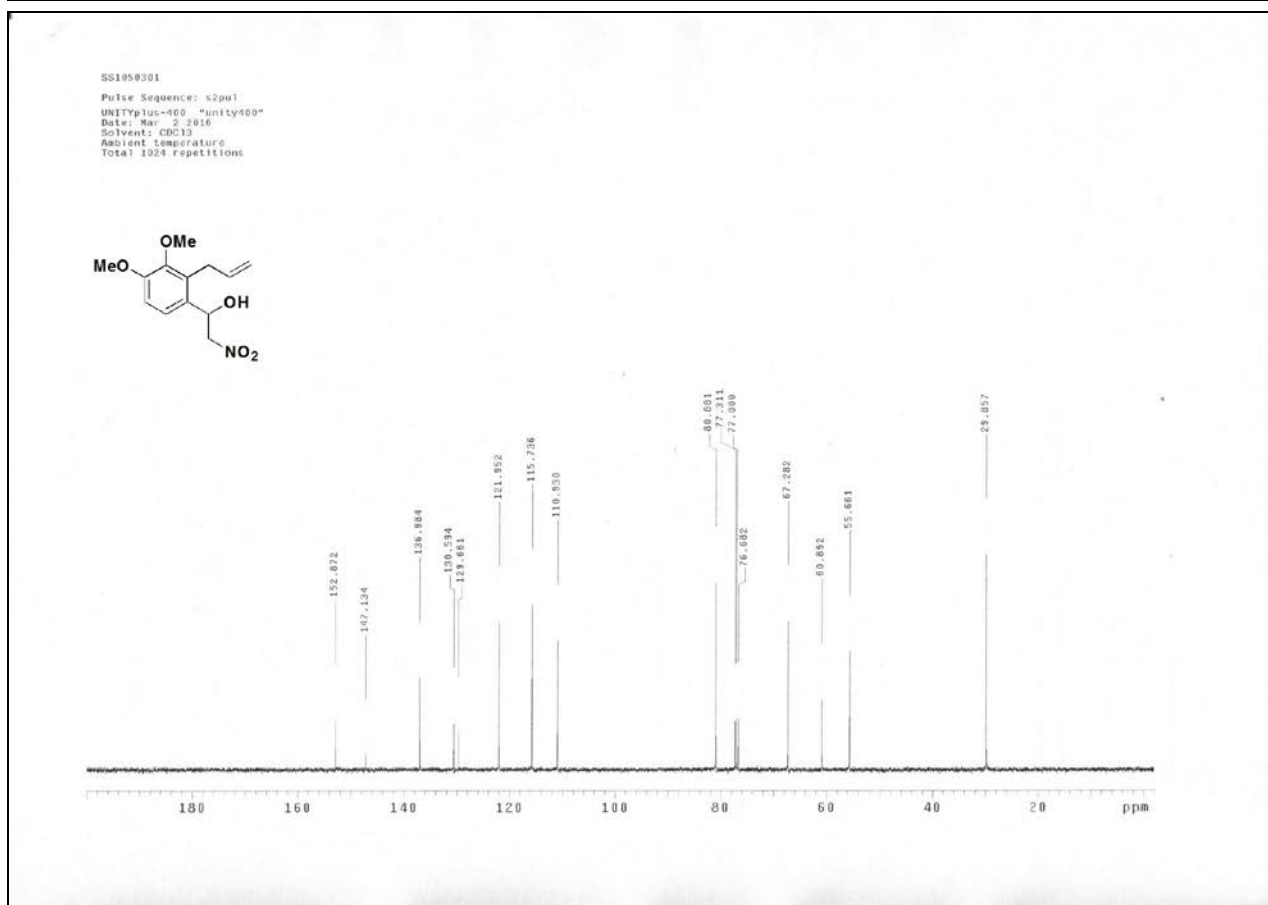

# Compound 5b

YR1050620  
Pulse Sequence: s2pul  
UNITYplus-400 "unity400"  
Date: Jun 23 2016  
Solvent: CDCl3  
Ambient temperature  
Total 32 repetitions

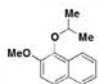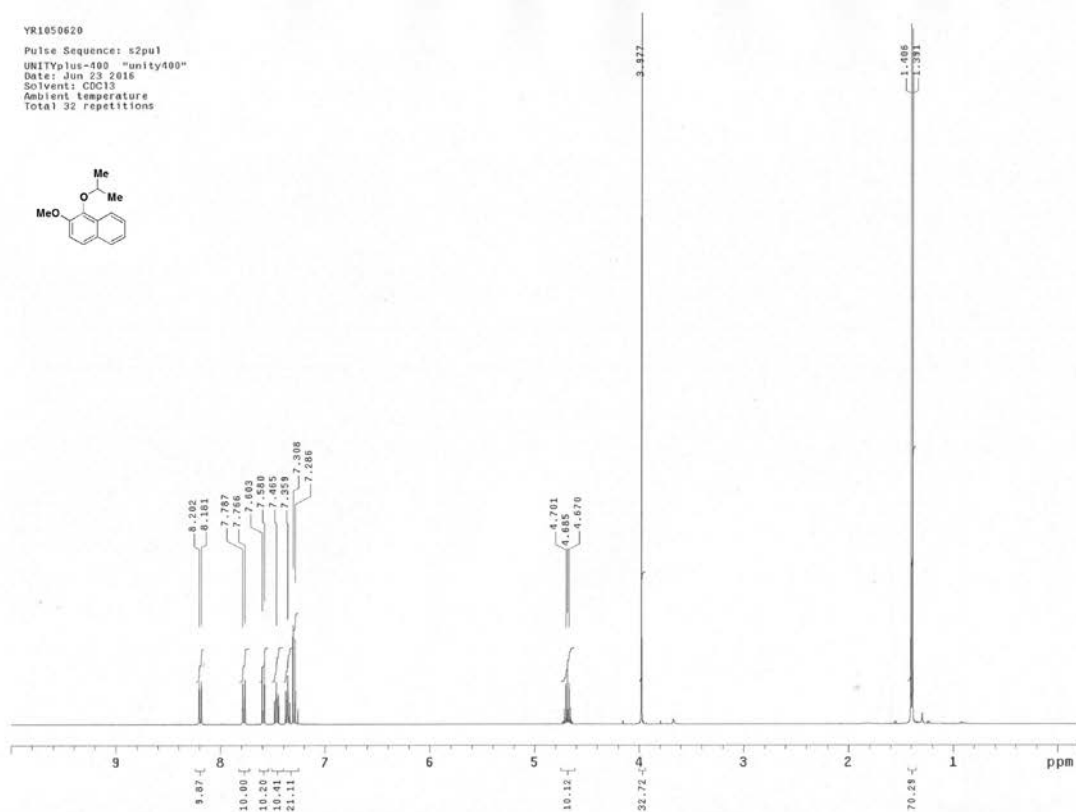

YR1050620  
Pulse Sequence: s2pul  
UNITYplus-400 "unity400"  
Date: Jun 23 2016  
Solvent: CDCl3  
Ambient temperature  
Total 688 repetitions

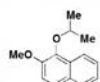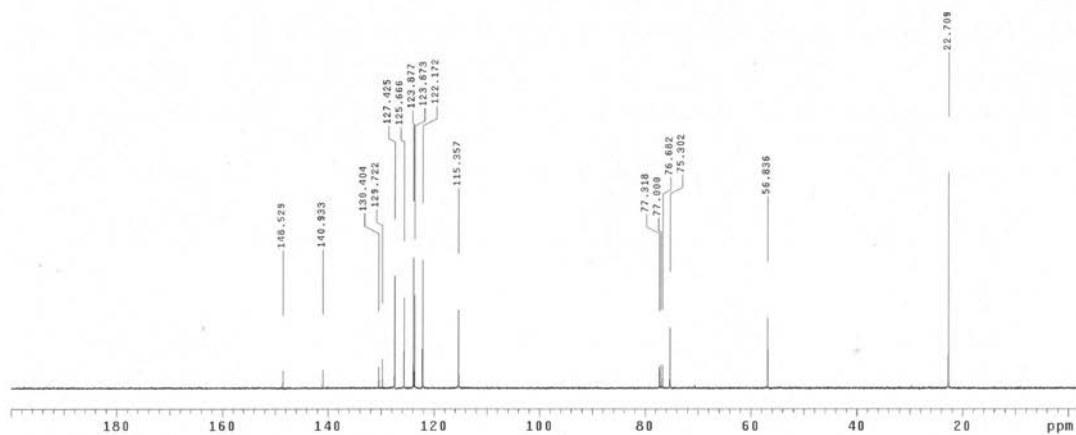

# Compound 5c

YR1050621  
Pulse Sequence: s2pul  
UNITYplus-400 "unity400"  
Date: Jun 23 2016  
Solvent: CDCl3  
Ambient temperature  
Total 32 repetitions

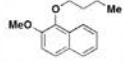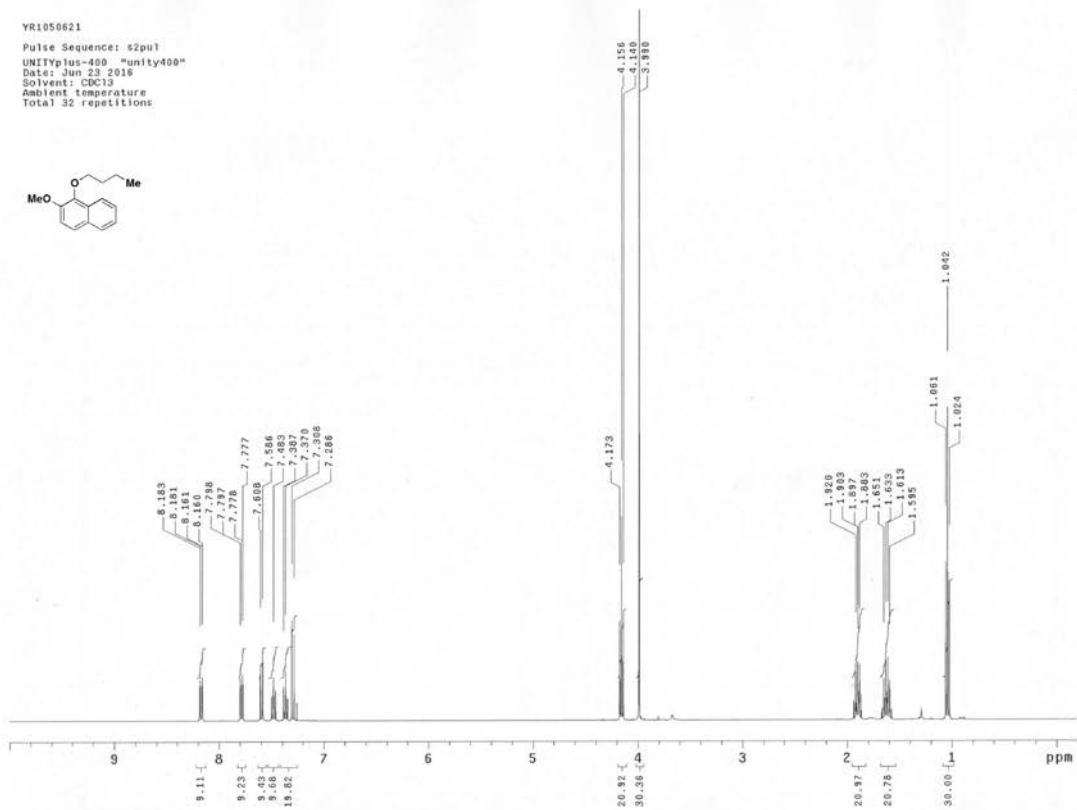

YR1050621  
Pulse Sequence: s2pul  
UNITYplus-400 "unity400"  
Date: Jun 23 2016  
Solvent: CDCl3  
Ambient temperature  
Total 1712 repetitions

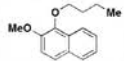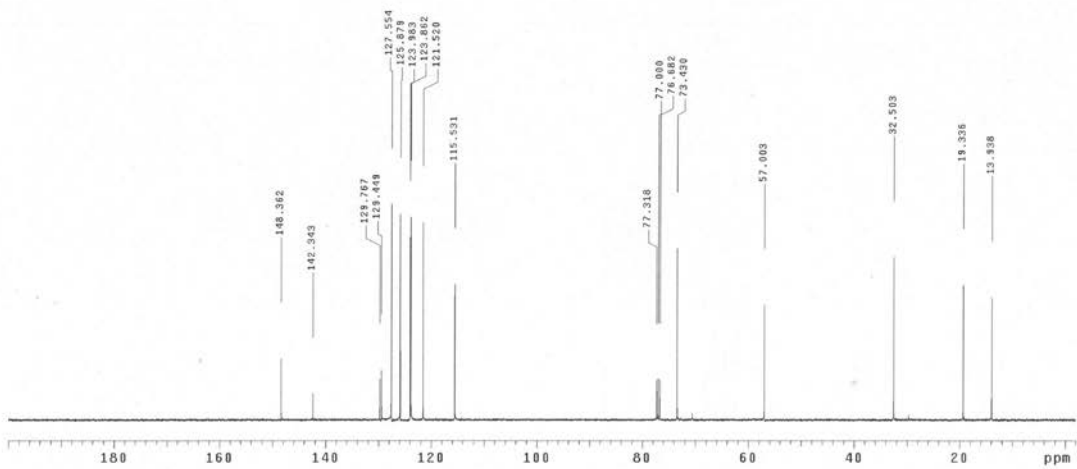

# Compound 5d

SS1050905  
 Pulse Sequence: s2pul  
 UNITYplus-400 "unity400"  
 Date: Sep 6 2016  
 Solvent: CDCl3  
 Ambient temperature  
 Total 32 repetitions

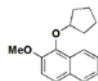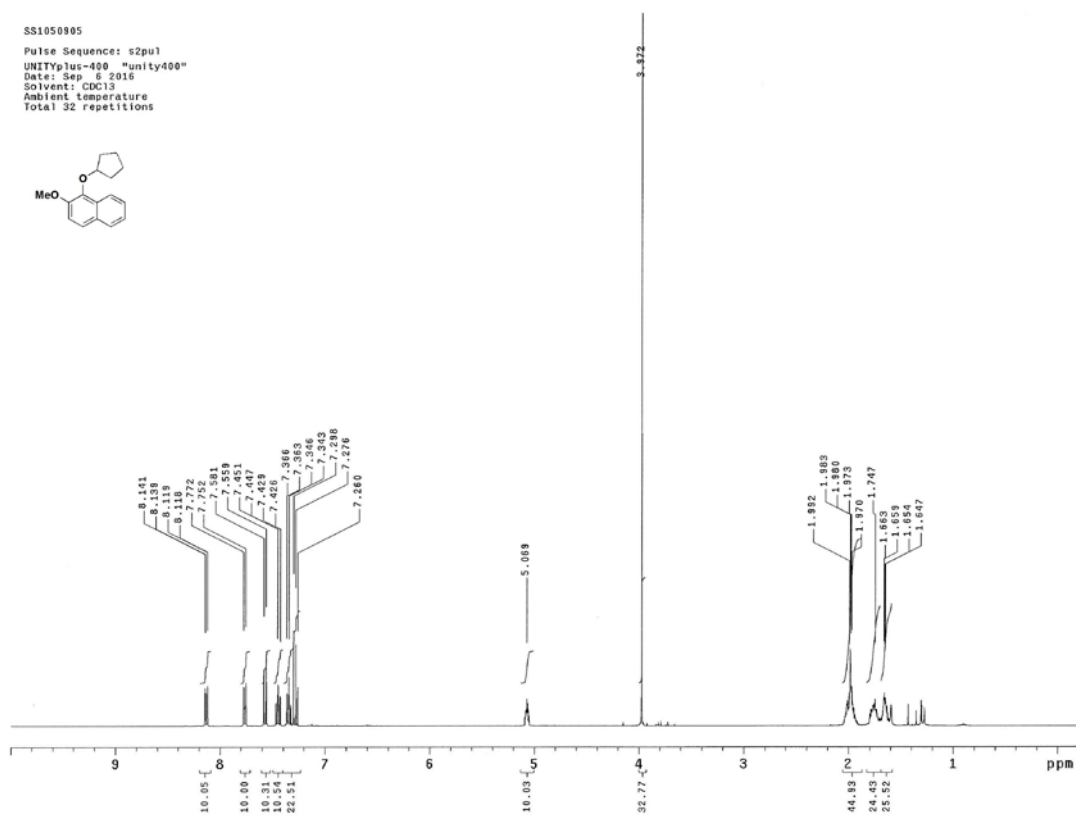

SS1050905  
 Pulse Sequence: s2pul  
 UNITYplus-400 "unity400"  
 Date: Sep 6 2016  
 Solvent: CDCl3  
 Ambient temperature  
 Total 784 repetitions

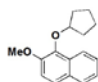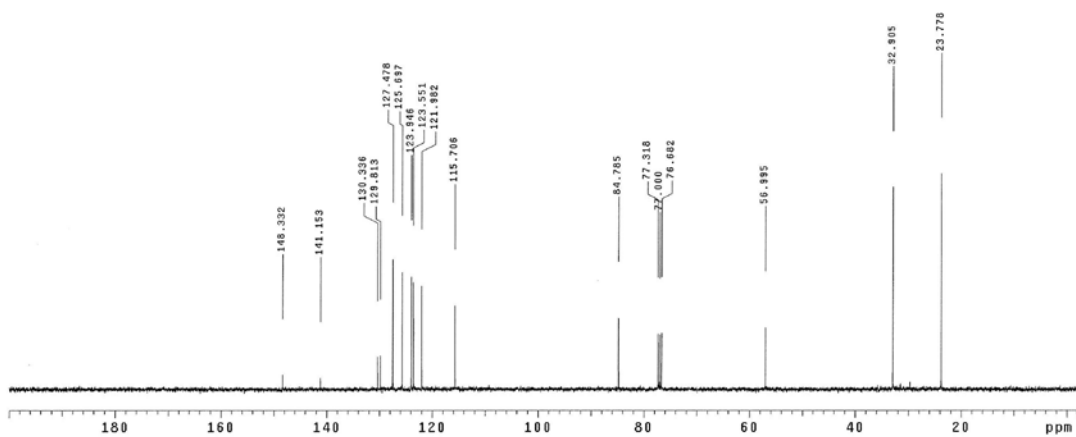

# Compound 5e

MH101003-1  
STANDARD 1H OBSERVE

Pulse Sequence: s2pul  
UNITYplus-400 "unity400"  
Date: Oct 15 2012  
Solvent: CDCl3  
Ambient temperature  
Total 32 repetitions

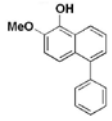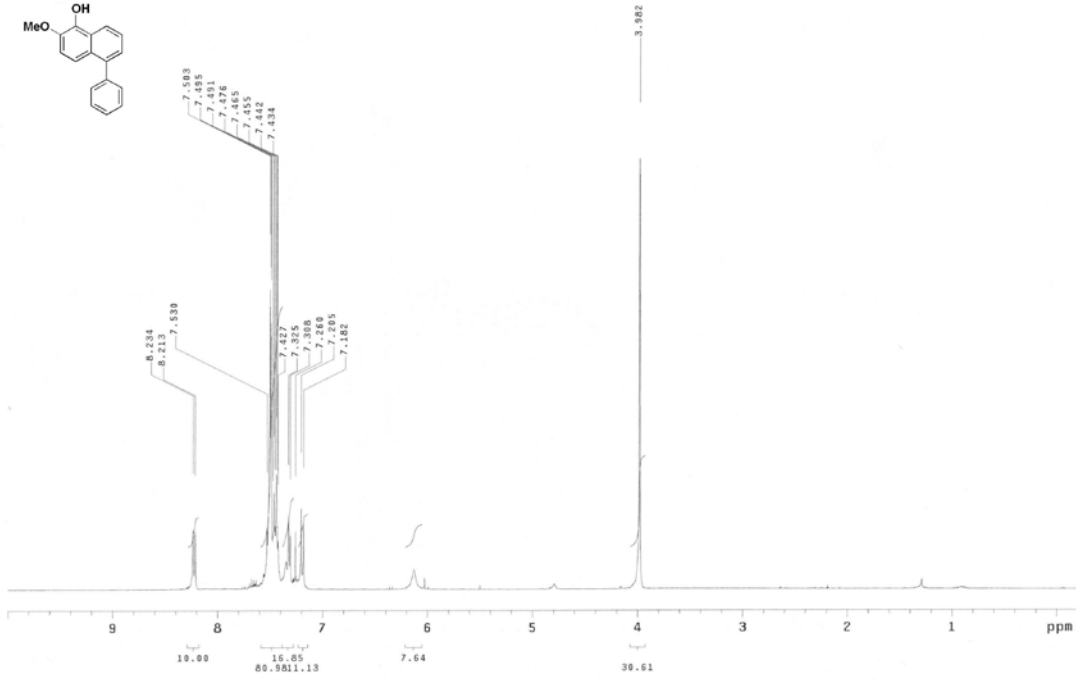

13C OBSERVE

MH101003-1  
Pulse Sequence: s2pul  
UNITYplus-400 "unity400"  
Date: Oct 15 2012  
Solvent: CDCl3  
Ambient temperature  
Total 1384 repetitions

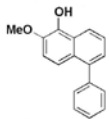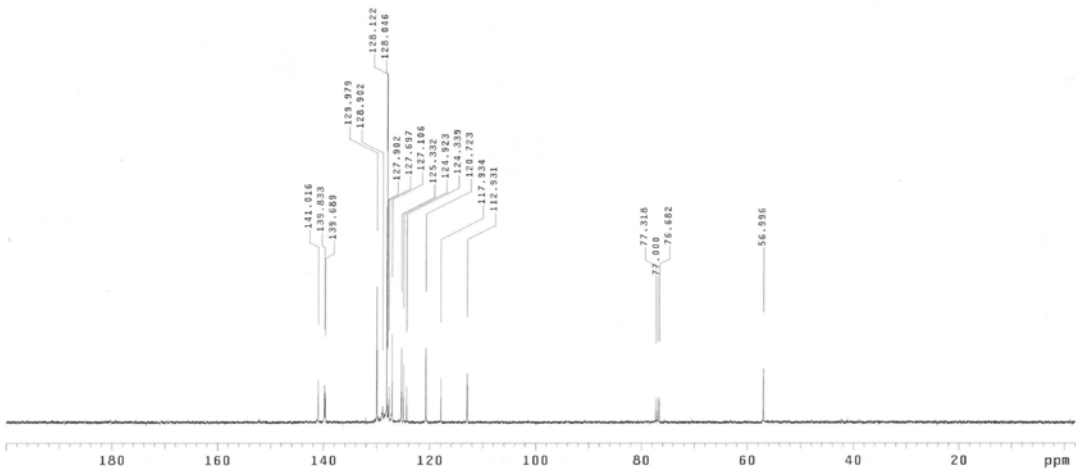

# Compound 5f

MH1011002-H  
 Pulse Sequence: s2pul  
 UNITYplus-400 "unity400"  
 Date: Oct 15 2012  
 Solvent: CDCl3  
 Ambient temperature  
 Total 32 repetitions

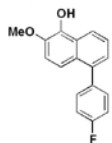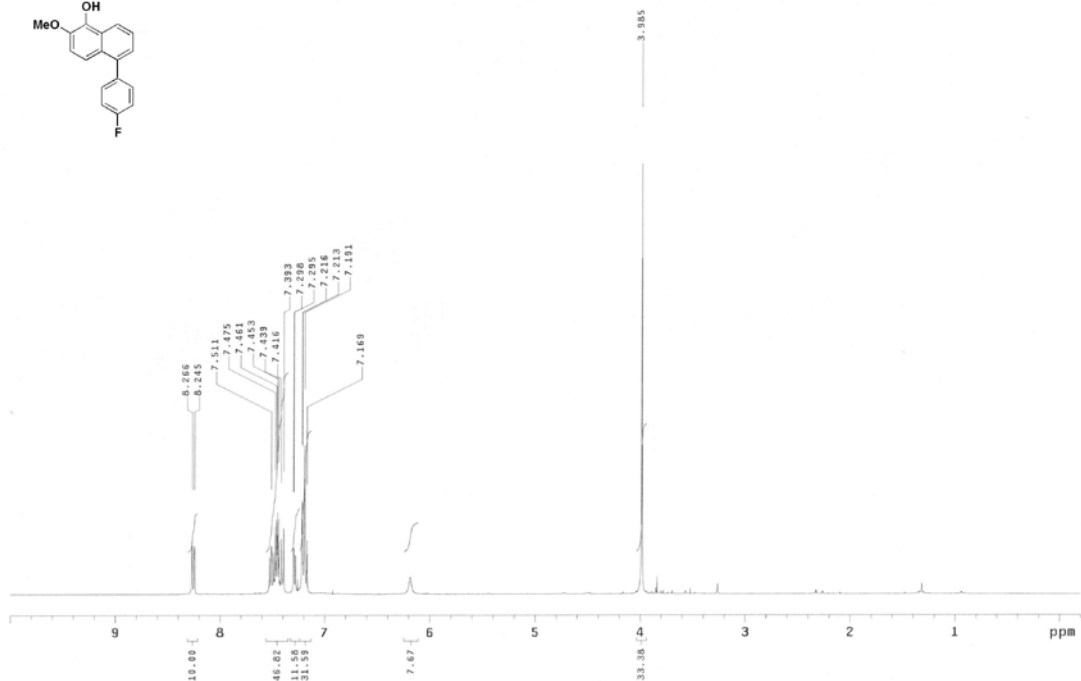

MH1011002-H  
 Pulse Sequence: s2pul  
 UNITYplus-400 "unity400"  
 Date: Oct 15 2012  
 Solvent: CDCl3  
 Ambient temperature  
 Total 896 repetitions

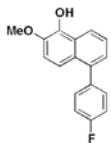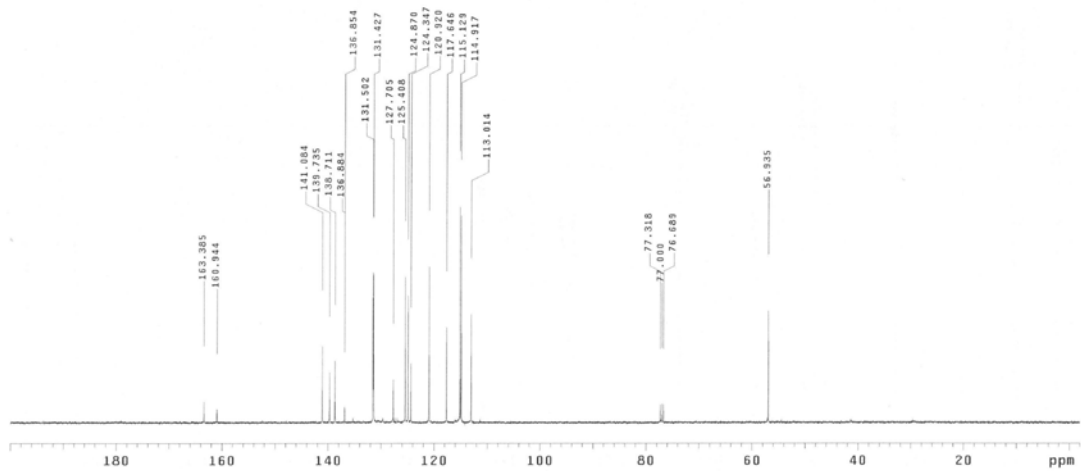



# Compound 5g

MH1010923  
Pulse Sequence: s2pul  
UNITYplus-400 "unity400"  
Date: Oct 8 2012  
Solvent: CDCl3  
Ambient temperature  
Total 40 repetitions

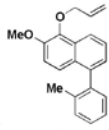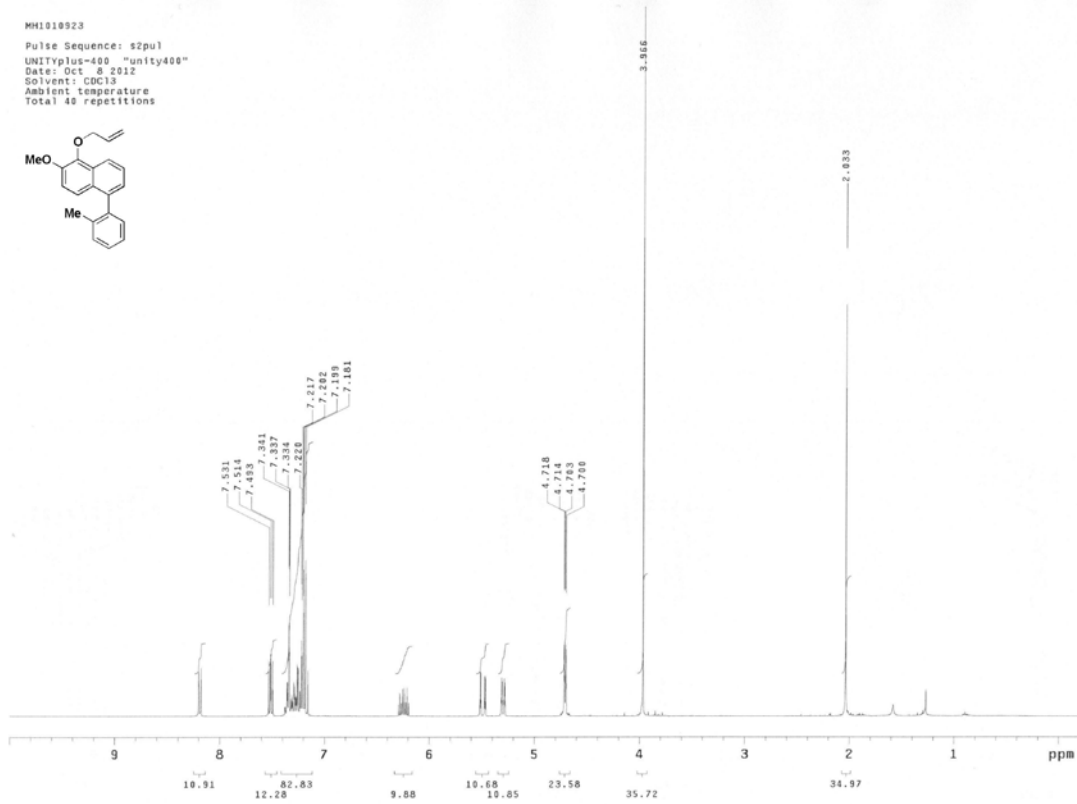

MH1010923  
Pulse Sequence: s2pul  
UNITYplus-400 "unity400"  
Date: Oct 8 2012  
Solvent: CDCl3  
Ambient temperature  
Total 2016 repetitions

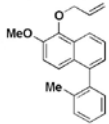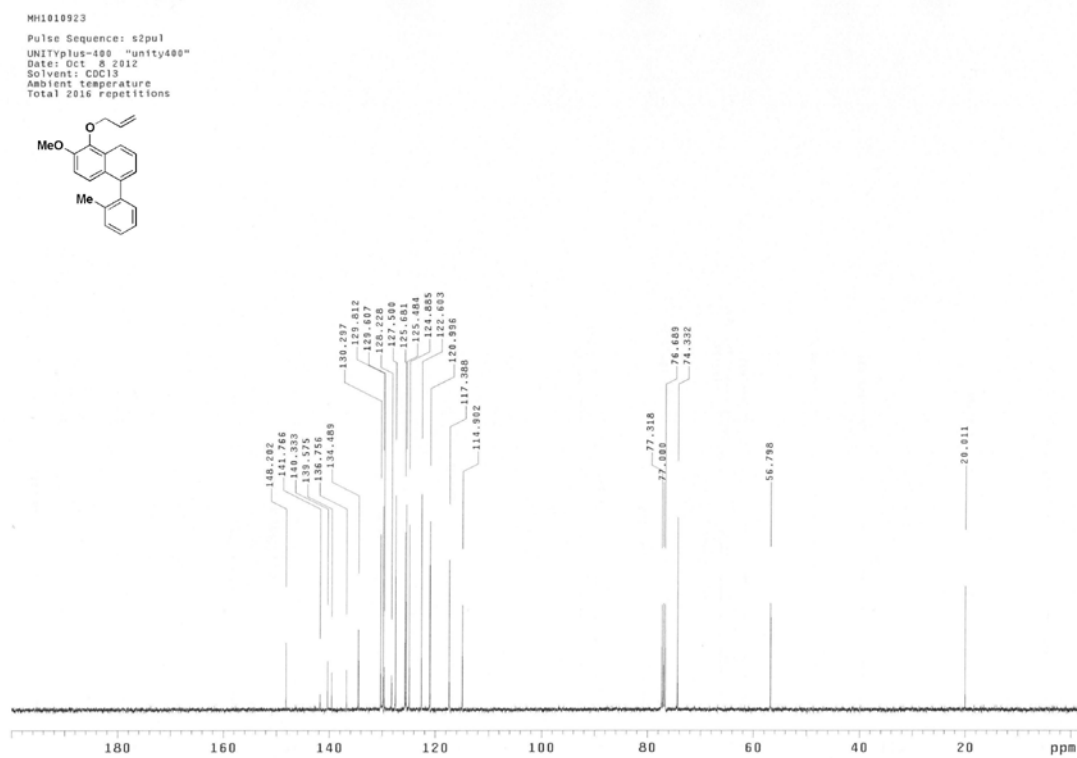

# Compound 5h

MH1010921  
Pulse Sequence: s2pul  
UNITYplus-400 "unity400"  
Date: Oct 8 2012  
Solvent: CDCl3  
Ambient temperature  
Total 32 repetitions

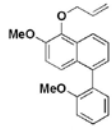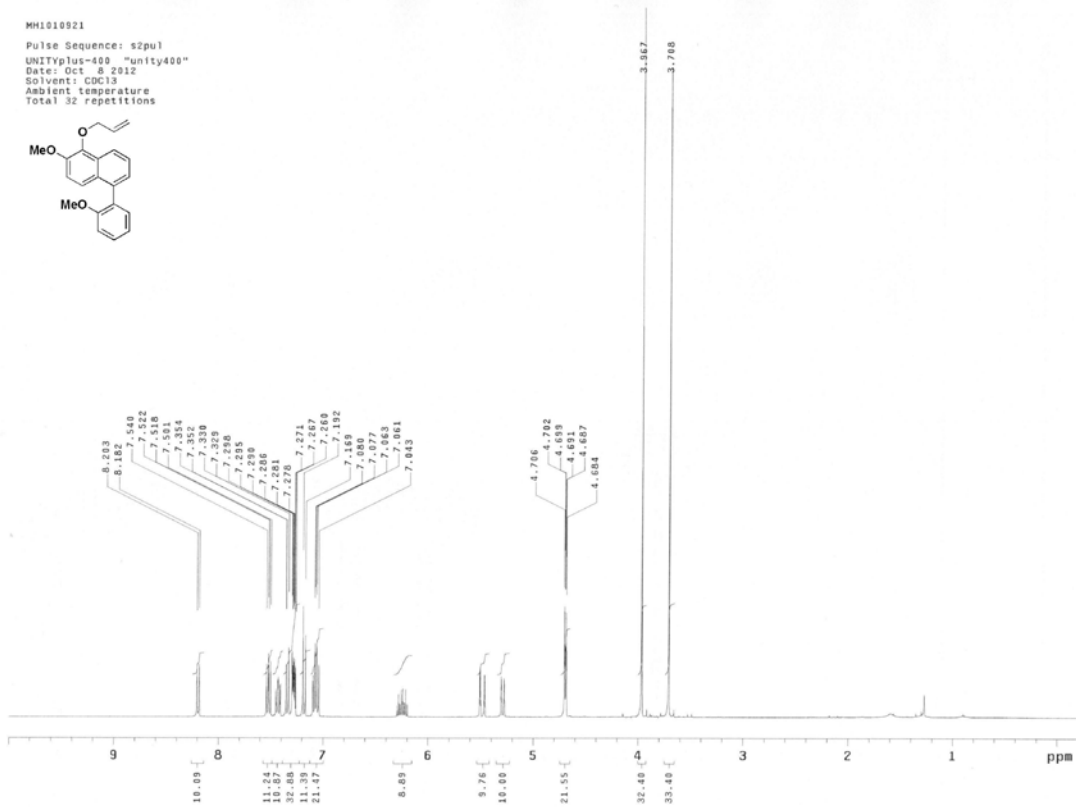

MH1010921  
Pulse Sequence: s2pul  
UNITYplus-400 "unity400"  
Date: Oct 8 2012  
Solvent: CDCl3  
Ambient temperature  
Total 138 repetitions

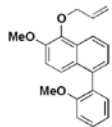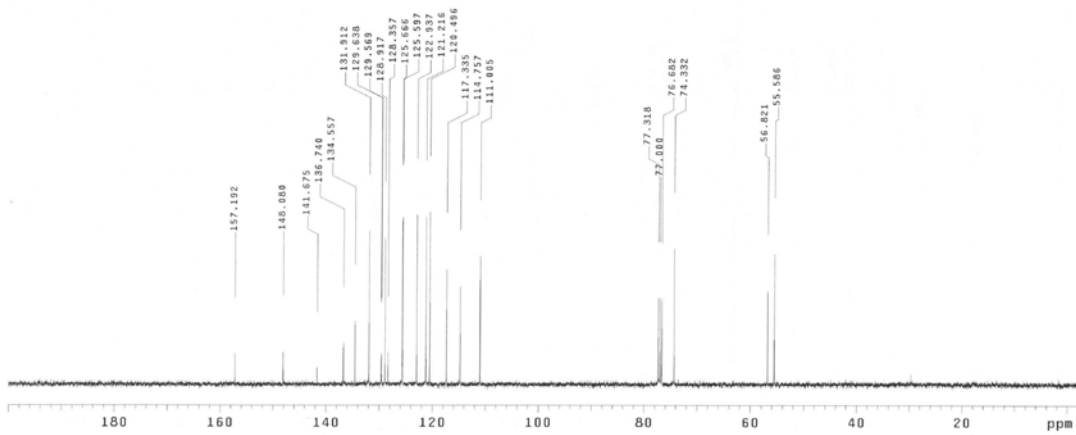

# Compound 5i

MH1010419  
 Pulse Sequence: s2pul  
 UNITYplus-400 "unity400"  
 Date: Apr 16 2012  
 Solvent: CDCl3  
 Ambient temperature  
 Total 80 repetitions

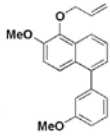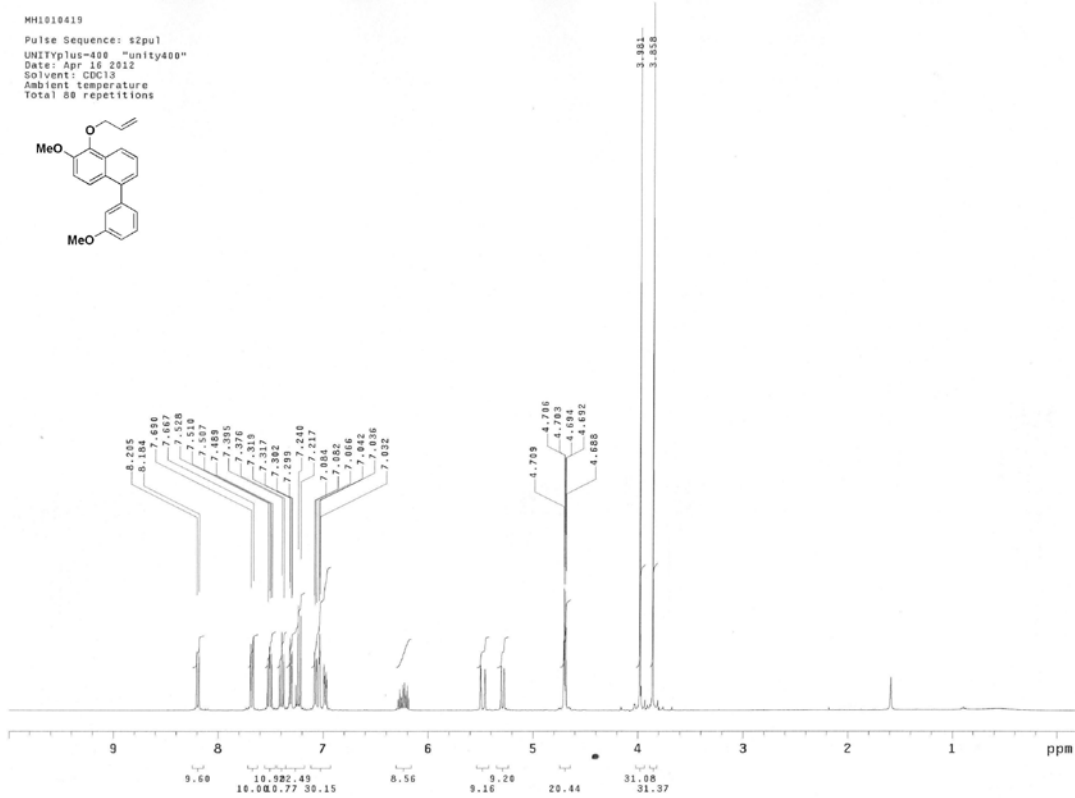

MH1010419  
 Pulse Sequence: s2pul  
 UNITYplus-400 "unity400"  
 Date: Apr 16 2012  
 Solvent: CDCl3  
 Ambient temperature  
 Total 14080 repetitions

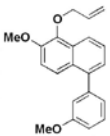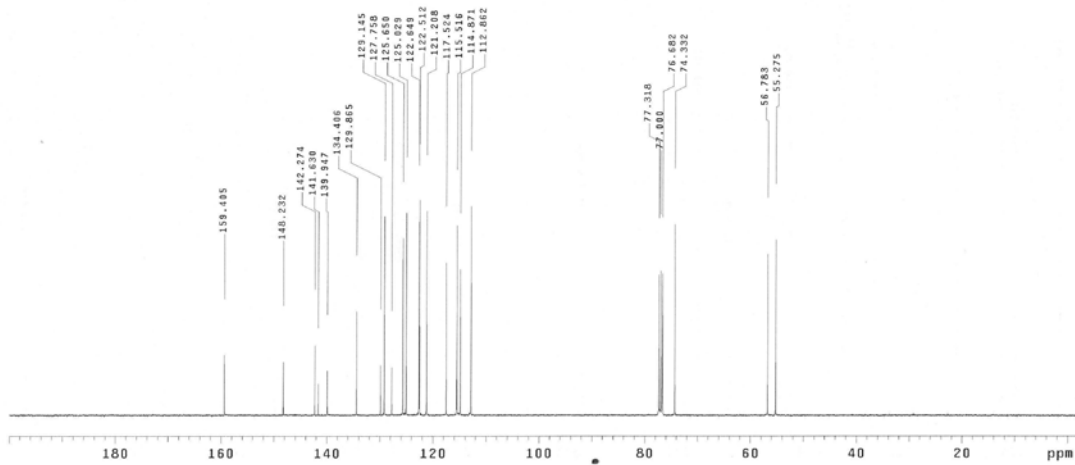

# Compound 5j

MH4NHM  
Pulse Sequence: s2pul  
UNITYplus-400 "unity400"  
Date: Jul 26 2012  
Solvent: CDCl3  
Ambient temperature  
Total 64 repetitions

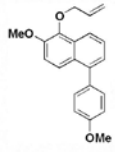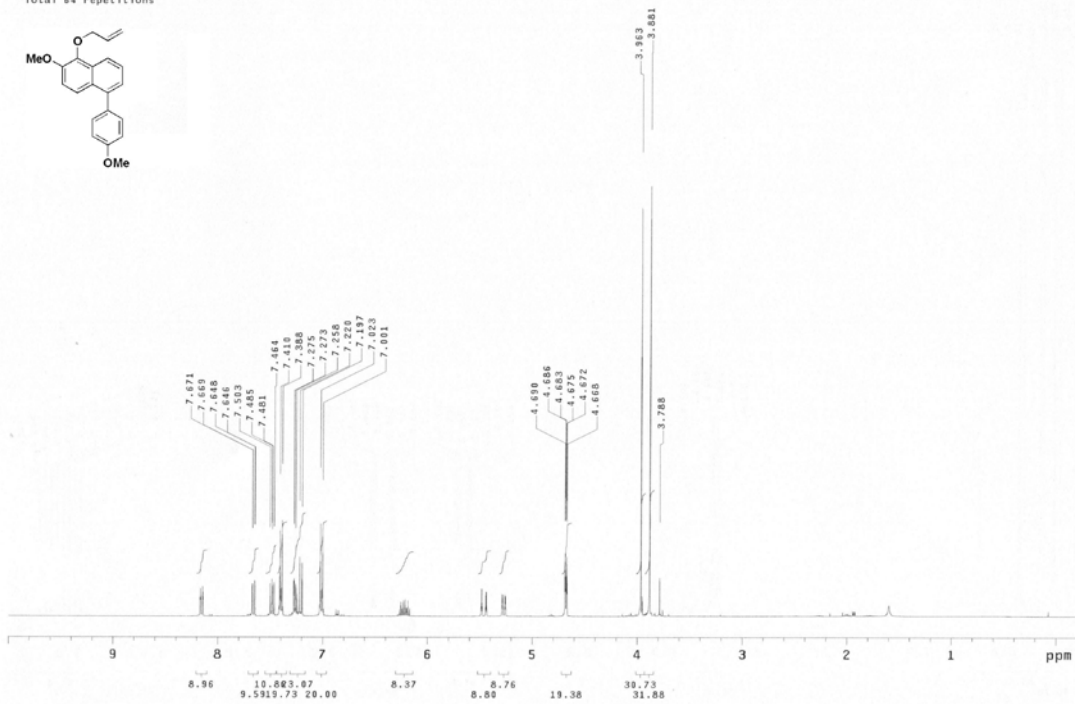

MH4NHM  
Pulse Sequence: s2pul  
UNITYplus-400 "unity400"  
Date: Jul 26 2012  
Solvent: CDCl3  
Ambient temperature  
Total 1984 repetitions

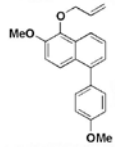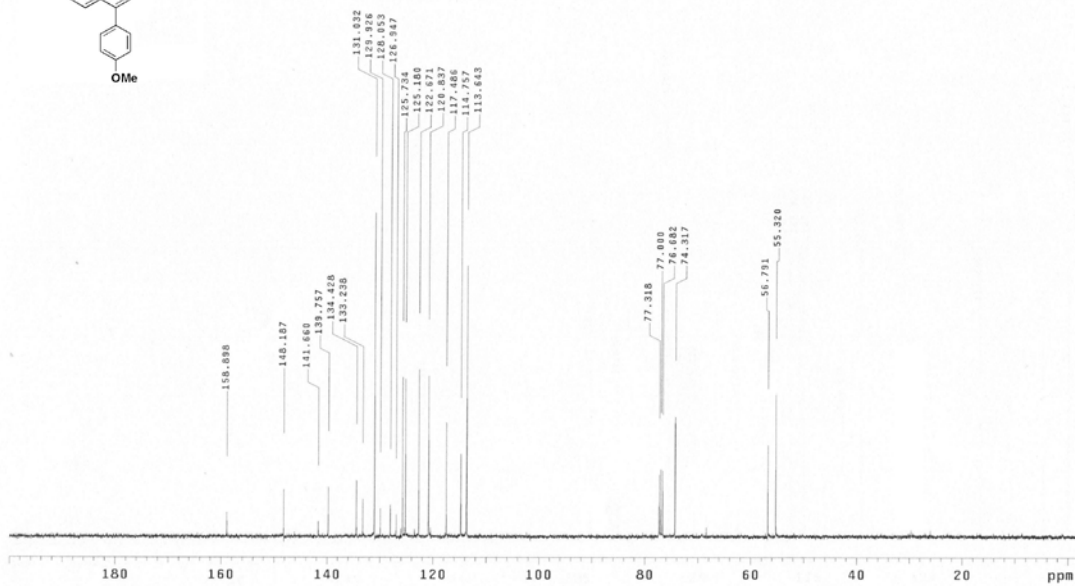

# Compound 5k

MH1010922  
Pulse Sequence: s2pul  
UNITYplus-400 "unity400"  
Date: Oct 8 2012  
Solvent: CDCl3  
Ambient temperature  
Total 64 repetitions

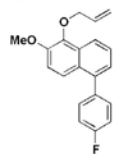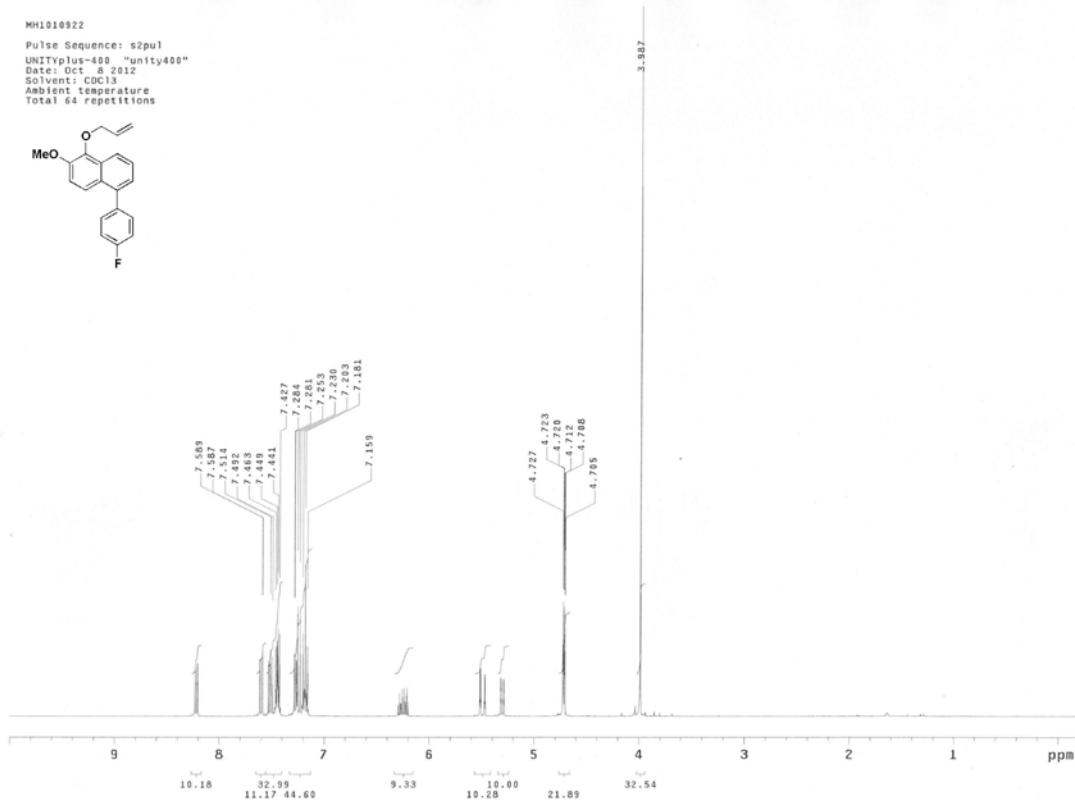

MH1010922  
Pulse Sequence: s2pul  
UNITYplus-400 "unity400"  
Date: Oct 8 2012  
Solvent: CDCl3  
Ambient temperature  
Total 1152 repetitions

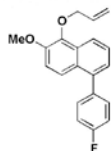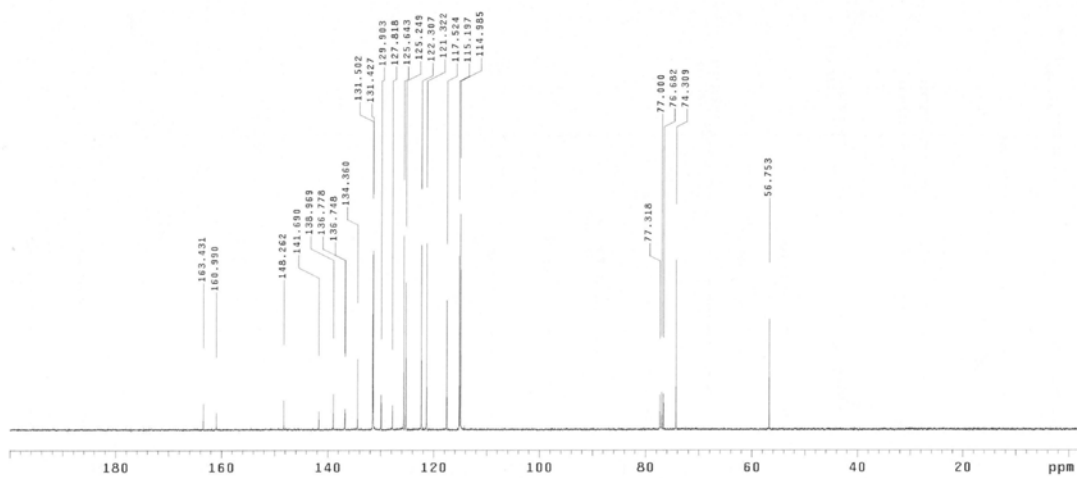

# Compound 5l

MH4NH02

Pulse Sequence: s2pul  
 UNITYplus-400 "unity400"  
 Date: Jul 26 2012  
 Solvent: CDCl3  
 Ambient temperature  
 Total 64 repetitions

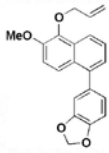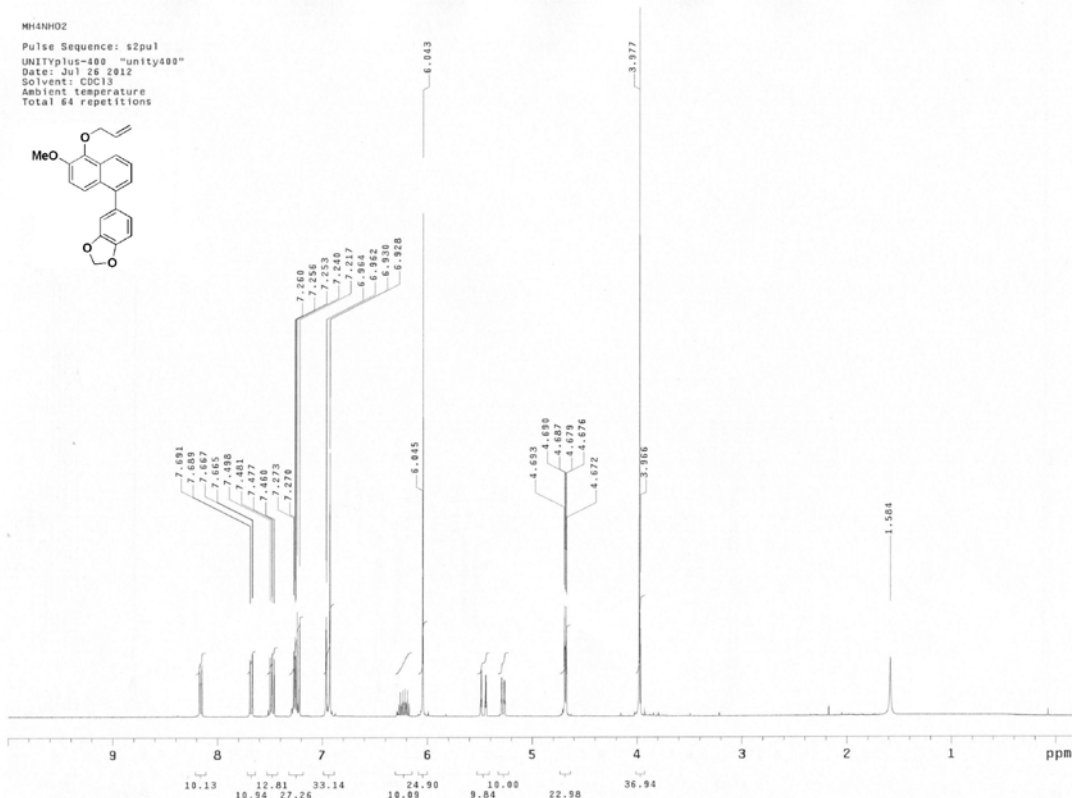

MH4NH02

Pulse Sequence: s2pul  
 UNITYplus-400 "unity400"  
 Date: Jul 26 2012  
 Solvent: CDCl3  
 Ambient temperature  
 Total 5200 repetitions

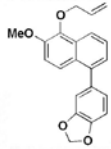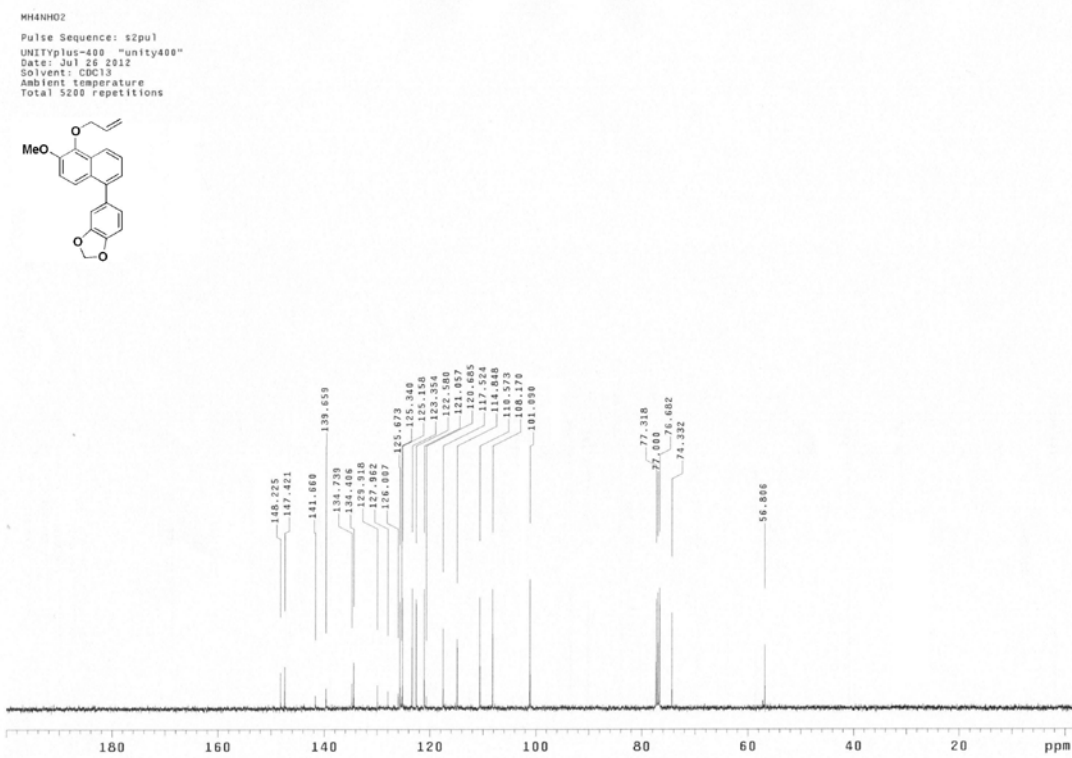

# Compound 5m

MH1010884

Pulse Sequence: s2pul  
UNITYplus-400 "unity400"  
Date: Sep 10 2012  
Solvent: CDCl3  
Ambient temperature  
Total 64 repetitions

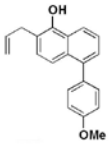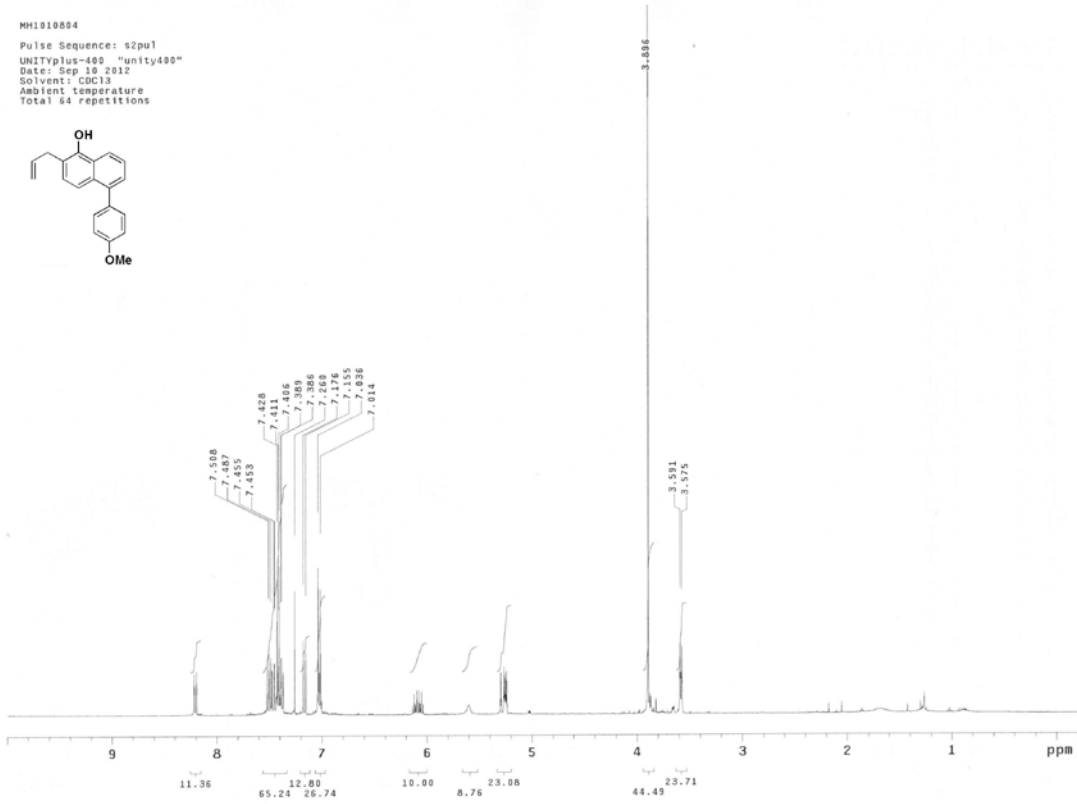

MH1010884

Pulse Sequence: s2pul  
UNITYplus-400 "unity400"  
Date: Sep 10 2012  
Solvent: CDCl3  
Ambient temperature  
Total 2008 repetitions

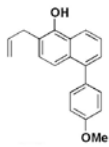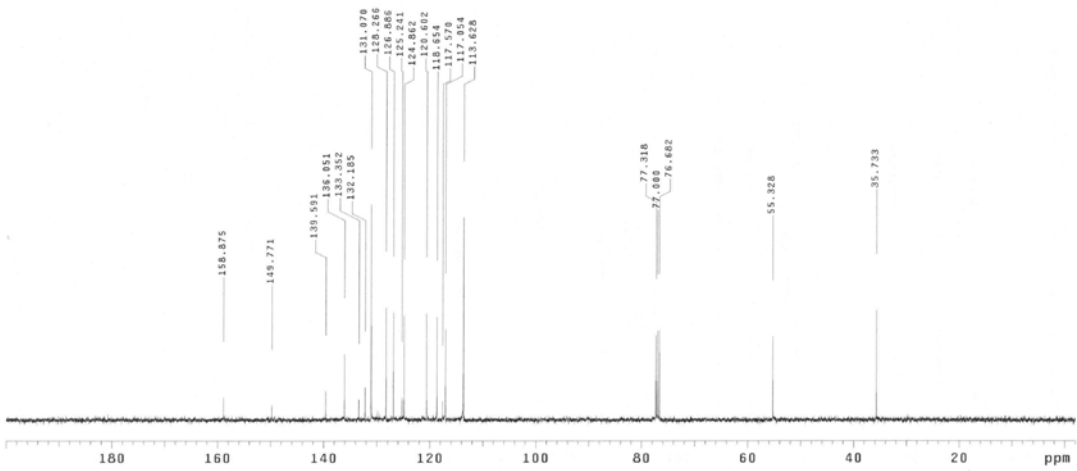

# Compound 5n

MH1010815-1  
Pulse Sequence: s2pul  
UNITYplus-400 "unity400"  
Date: Sep 19 2012  
Solvent: CDCl3  
Ambient temperature  
Total 64 repetitions

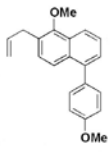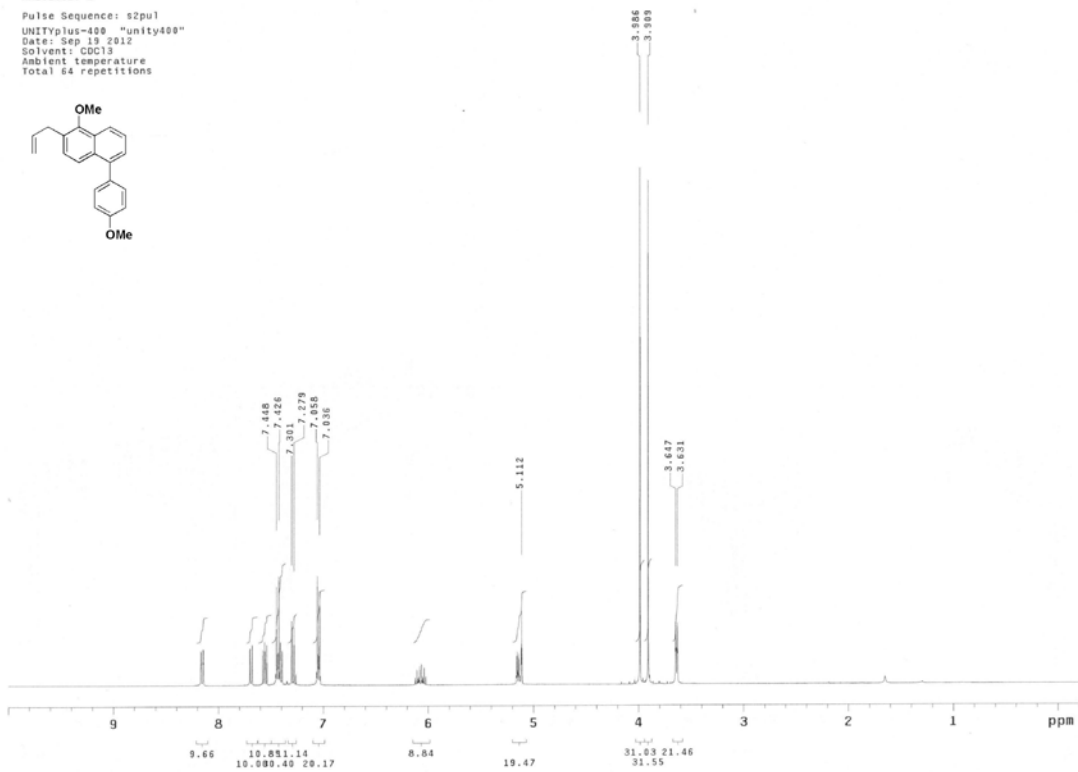

MH1010815-1  
Pulse Sequence: s2pul  
UNITYplus-400 "unity400"  
Date: Sep 19 2012  
Solvent: CDCl3  
Ambient temperature  
Total 256 repetitions

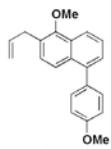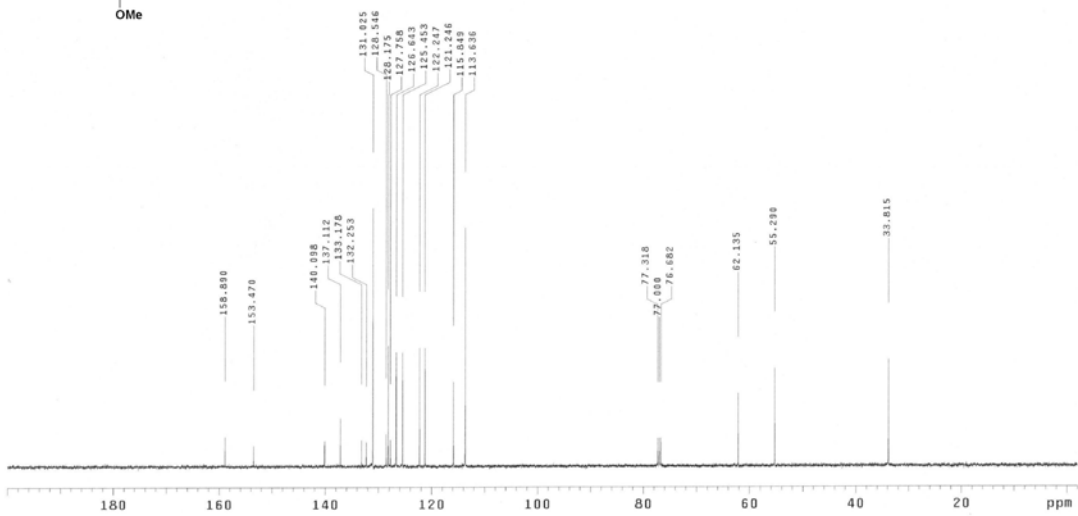



# Compound 5o

MH1010915-1  
 Pulse Sequence: s2pul  
 UNITYplus-400 "unity400"  
 Date: Oct 2 2012  
 Solvent: CDCl3  
 Ambient temperature  
 Total 64 repetitions

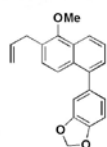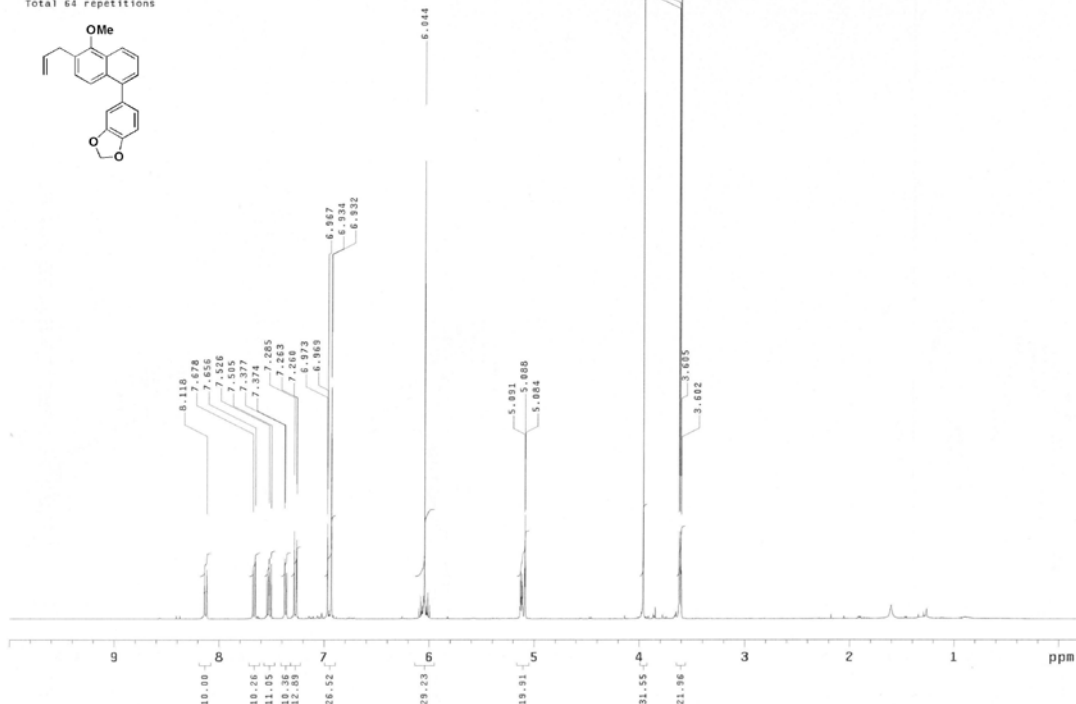

MH1010915-1  
 Pulse Sequence: s2pul  
 UNITYplus-400 "unity400"  
 Date: Oct 2 2012  
 Solvent: CDCl3  
 Ambient temperature  
 Total 2480 repetitions

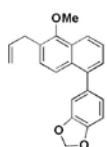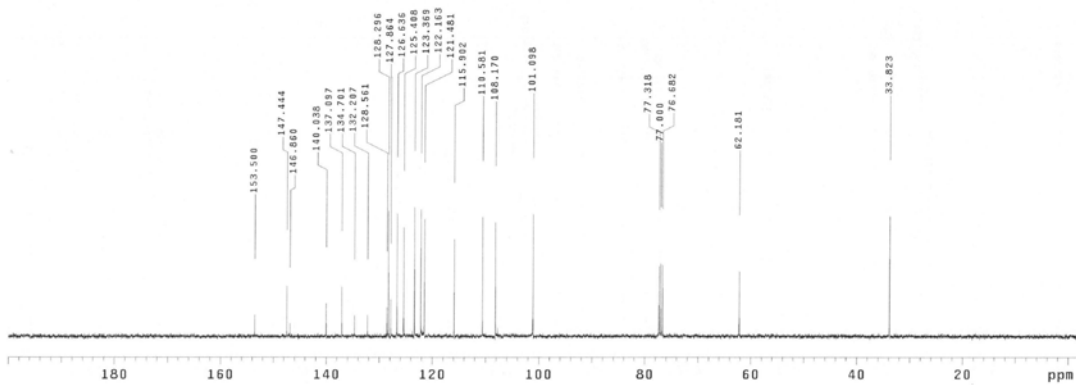

# Compound 7a

MH1010815-2  
 Pulse Sequence: s2pul  
 UNITYplus-400 "unity400"  
 Date: Sep 19 2012  
 Solvent: CDCl3  
 Ambient Temperature  
 Total 64 repetitions

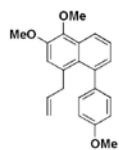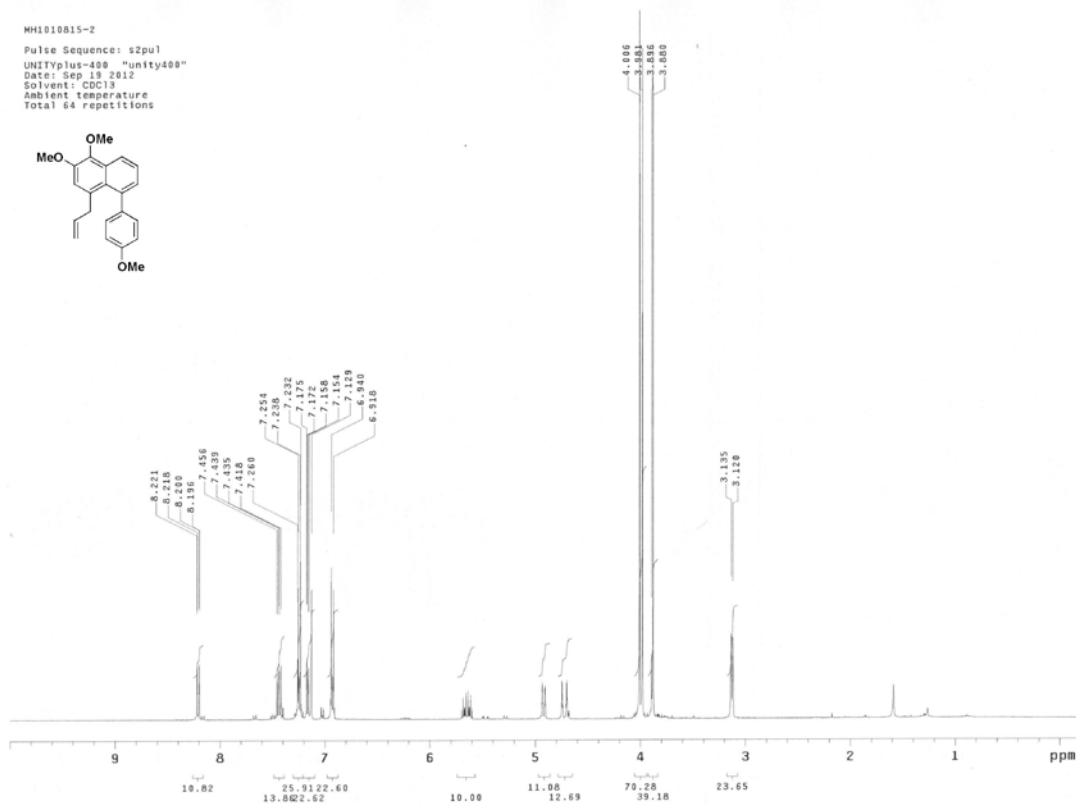

MH1010815-2  
 Pulse Sequence: s2pul  
 UNITYplus-400 "unity400"  
 Date: Sep 19 2012  
 Solvent: CDCl3  
 Ambient Temperature  
 Total 1568 repetitions

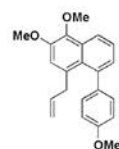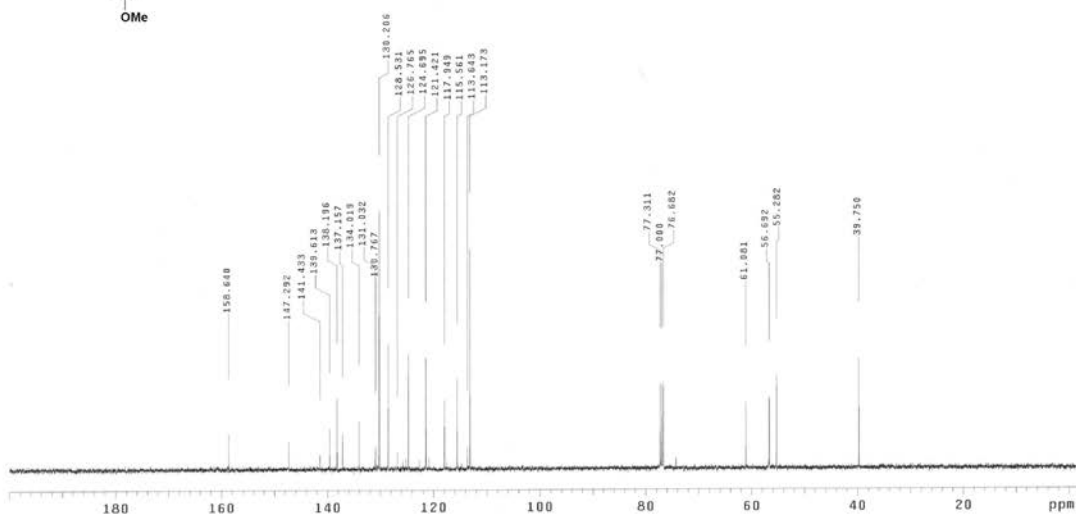

# Compound 7b

MH1010915-2  
 Pulse Sequence: s2pul  
 UNITYplus-400 "unity400"  
 Date: Oct 4 2012  
 Solvent: CDCl3  
 Ambient temperature  
 Total 64 repetitions

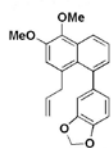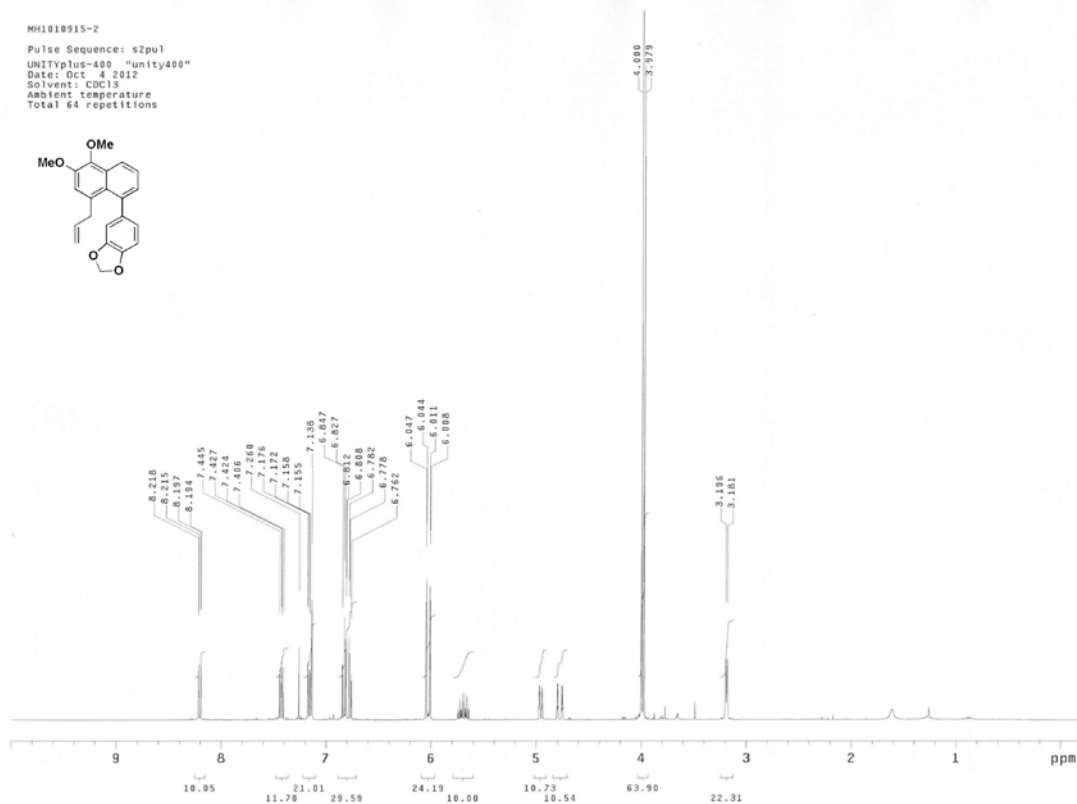

MH1010915-2  
 Pulse Sequence: s2pul  
 UNITYplus-400 "unity400"  
 Date: Oct 4 2012  
 Solvent: CDCl3  
 Ambient temperature  
 Total 1568 repetitions

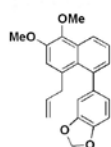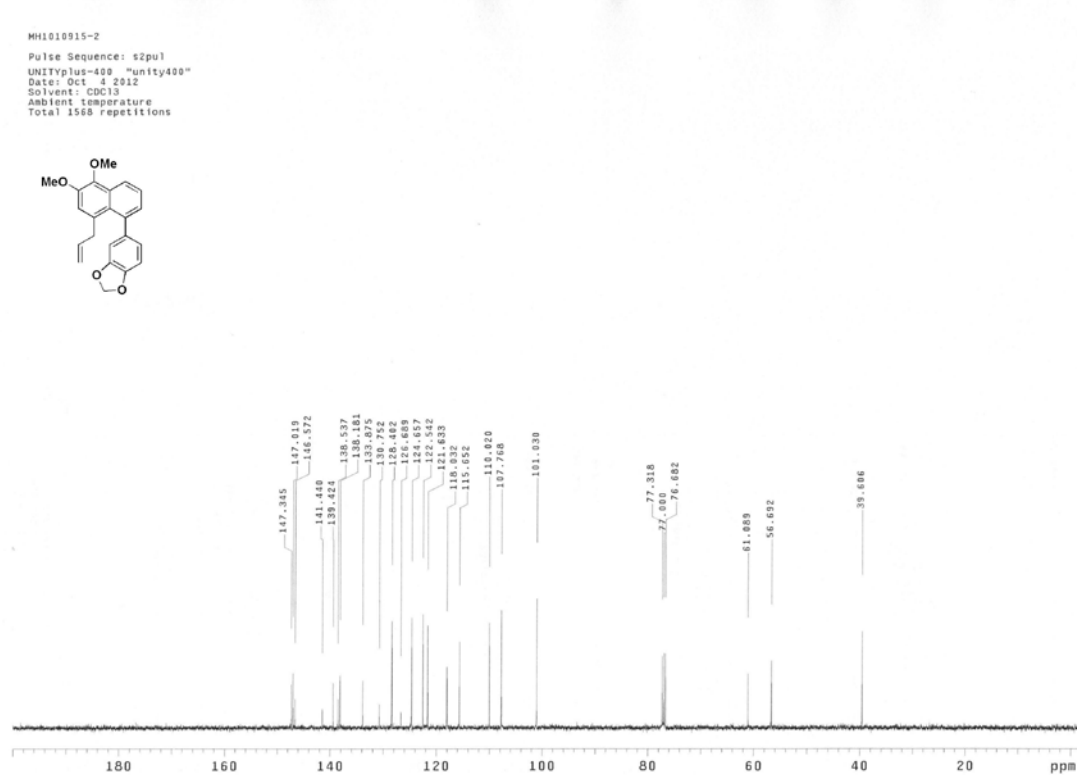

# Compound 8a

SS1050928  
Pulse Sequence: s2pul  
UNITYplus-400 "unity400"  
Date: Sep 30 2016  
Solvent: CDCl3  
Ambient temperature  
Total 32 repetitions

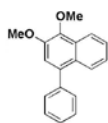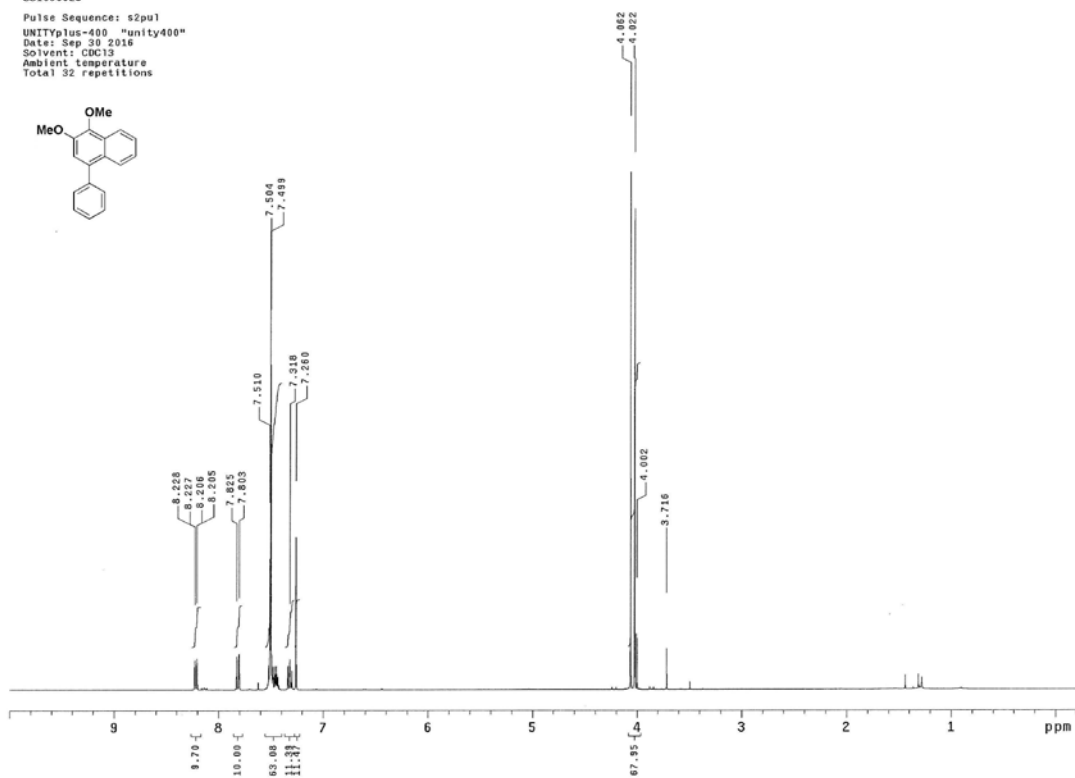

SS1050928  
Pulse Sequence: s2pul  
UNITYplus-400 "unity400"  
Date: Sep 30 2016  
Solvent: CDCl3  
Ambient temperature  
Total 1200 repetitions

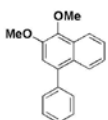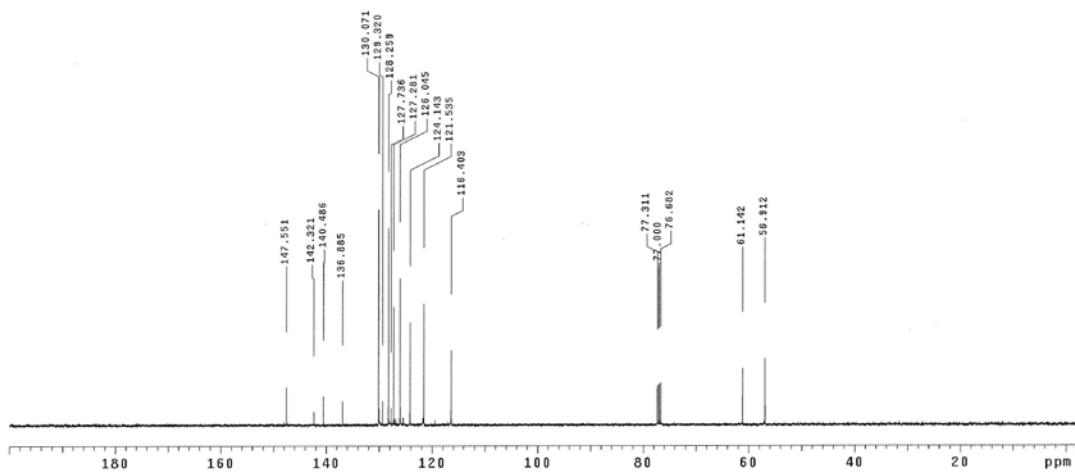

# Compound 8b

SS1050929  
 Pulse Sequence: s2pul  
 UNITYplus-400 "unity400"  
 Date: Sep 30 2016  
 Solvent: CDCl3  
 Ambient temperature  
 Total 32 repetitions

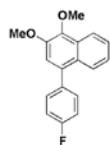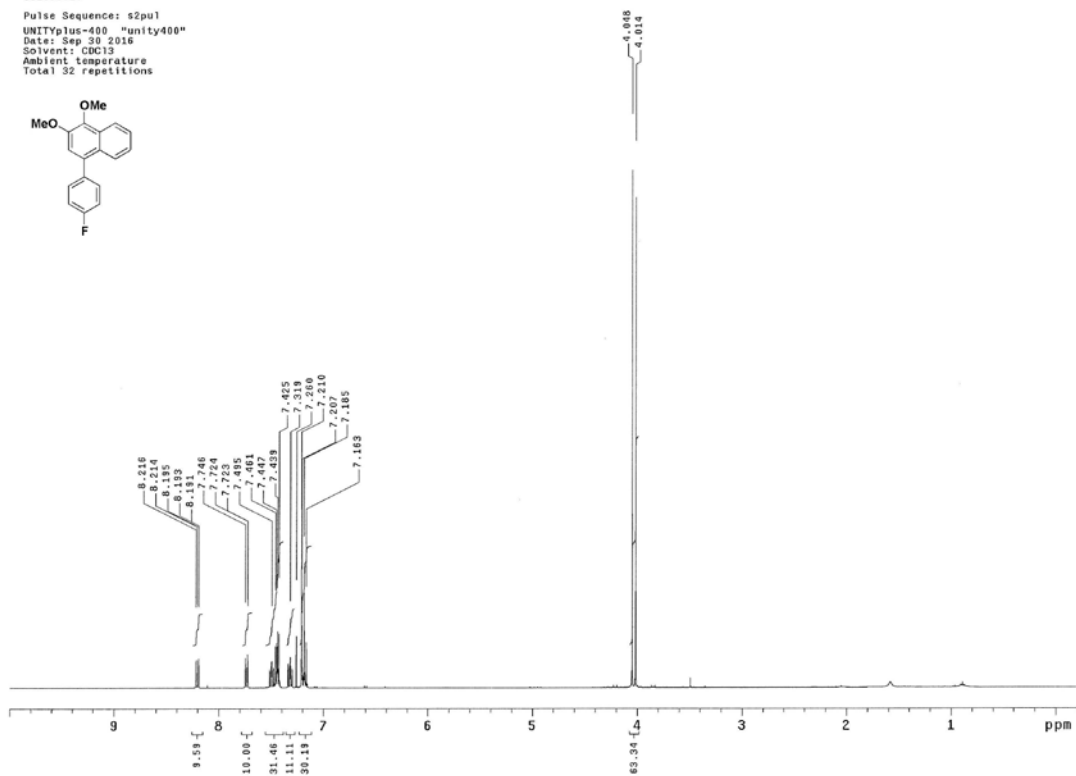

SS1050929  
 Pulse Sequence: s2pul  
 UNITYplus-400 "unity400"  
 Date: Sep 30 2016  
 Solvent: CDCl3  
 Ambient temperature  
 Total 1455 repetitions

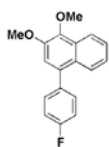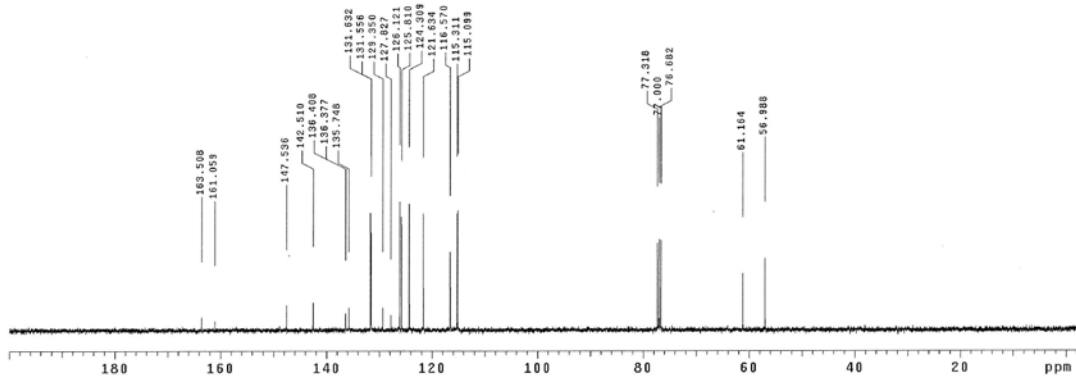

# Compound 8c

SS1050920  
Pulse Sequence: s2pul  
UNITYplus-400 "unity400"  
Date: Sep 20 2016  
Solvent: CDCl3  
Ambient temperature  
Total 32 repetitions

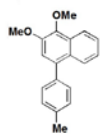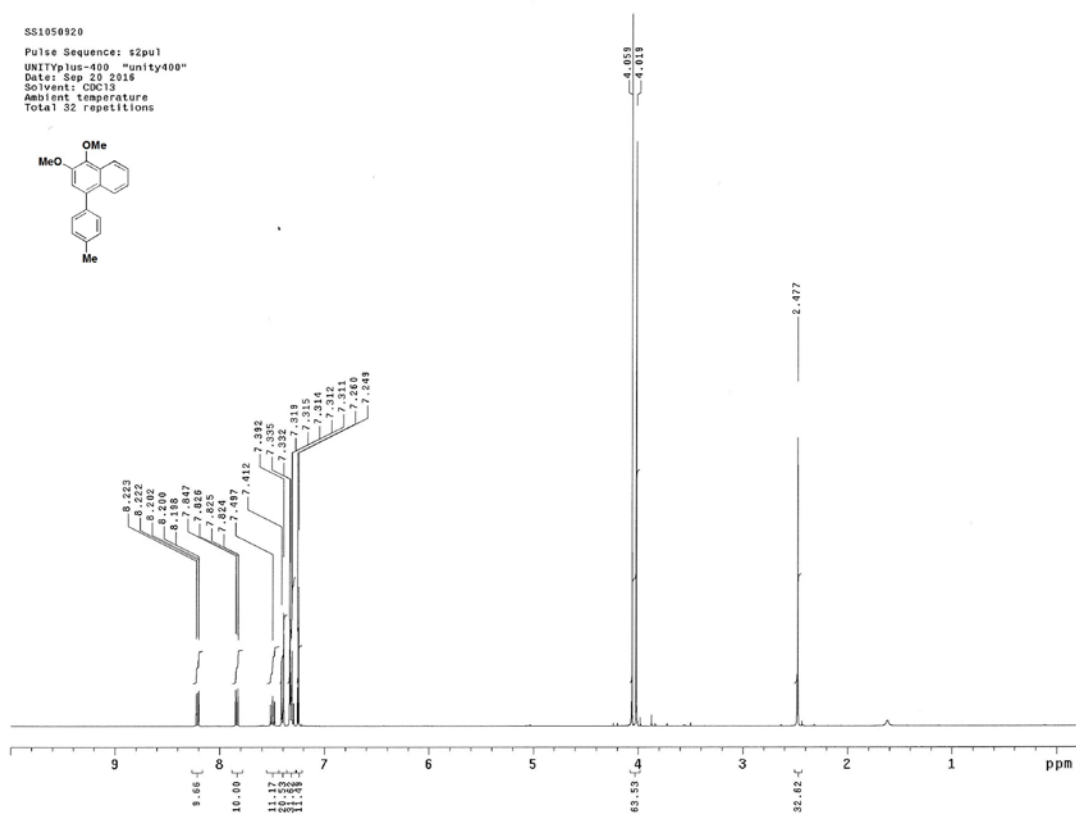

SS1050920  
Pulse Sequence: s2pul  
UNITYplus-400 "unity400"  
Date: Sep 20 2016  
Solvent: CDCl3  
Ambient temperature  
Total 640 repetitions

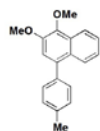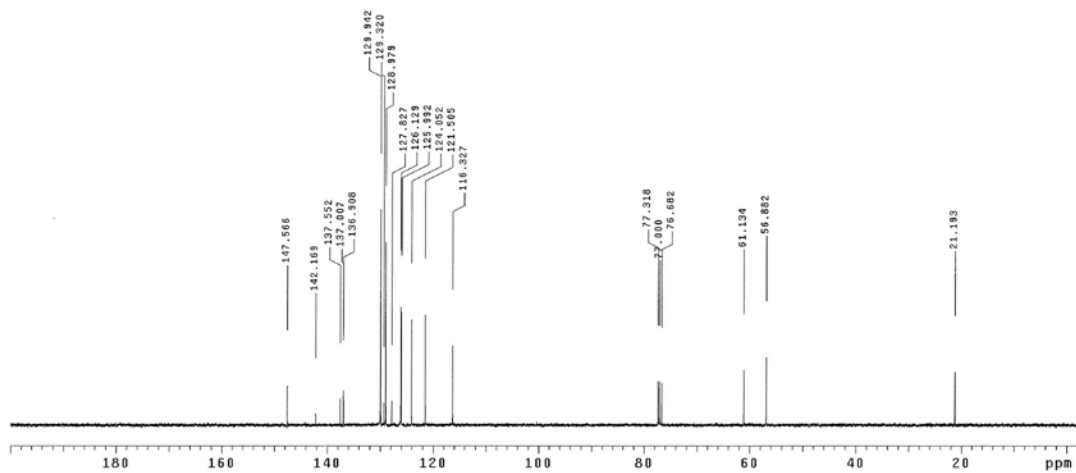

# Compound 8d

SS1051006  
Pulse Sequence: s2pul  
UNITYplus-400 "unity400"  
Date: Oct 6 2016  
Solvent: CDCl3  
Ambient temperature  
Total 32 repetitions

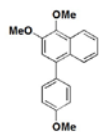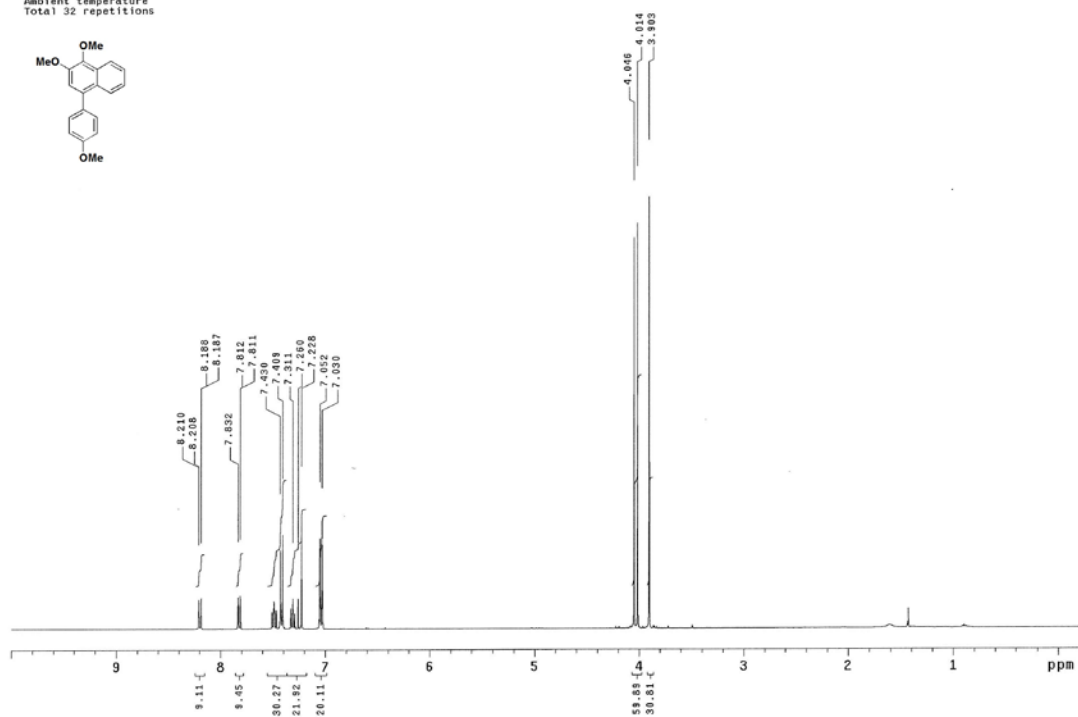

SS1051006  
Pulse Sequence: s2pul  
UNITYplus-400 "unity400"  
Date: Oct 6 2016  
Solvent: CDCl3  
Ambient temperature  
Total 1312 repetitions

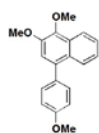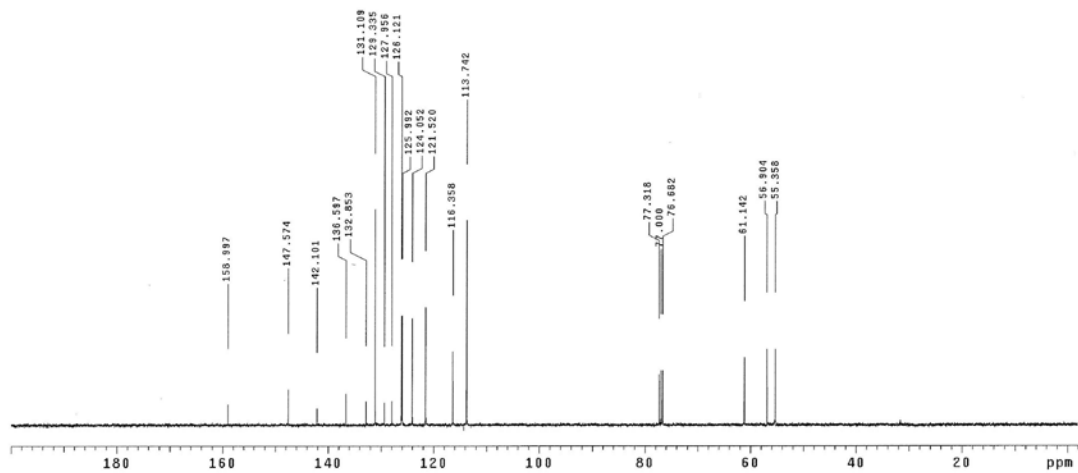

# Compound 8e

SS1051007  
Pulse Sequence: s2pul  
UNITYplus-400 "unity400"  
Date: Oct 11 2016  
Solvent: CDCl3  
Ambient temperature  
Total 32 repetitions

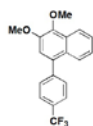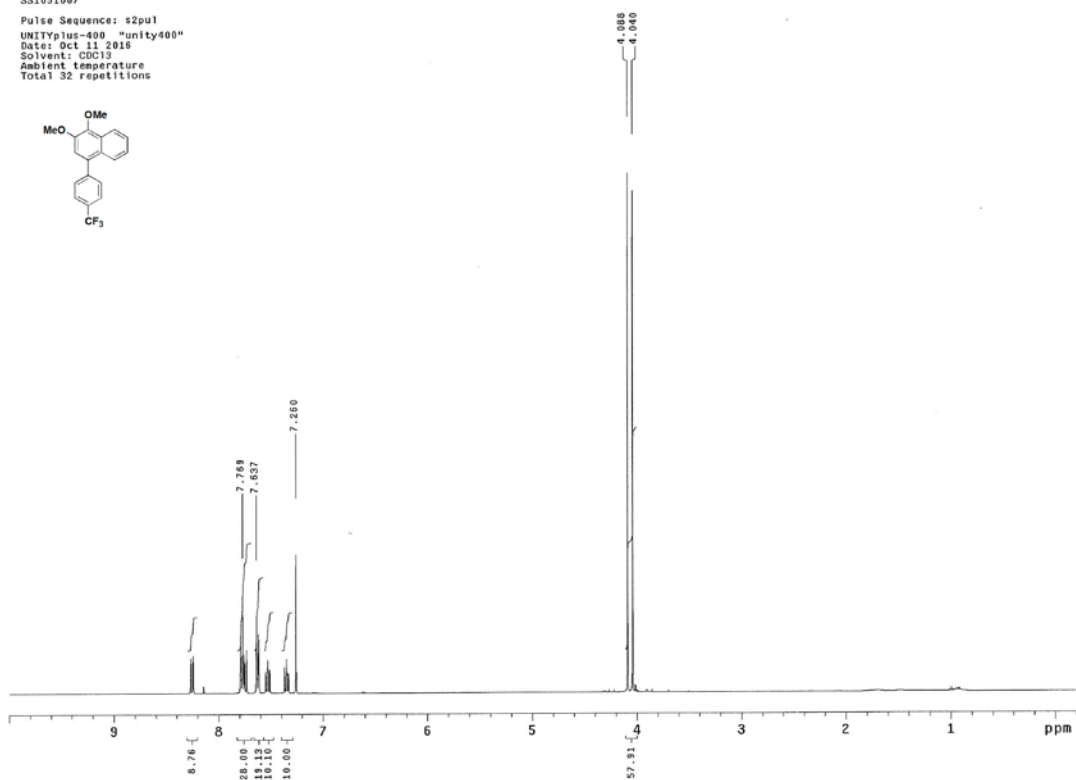

SS1051007  
Pulse Sequence: s2pul  
UNITYplus-400 "unity400"  
Date: Oct 11 2016  
Solvent: CDCl3  
Ambient temperature  
Total 480 repetitions

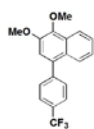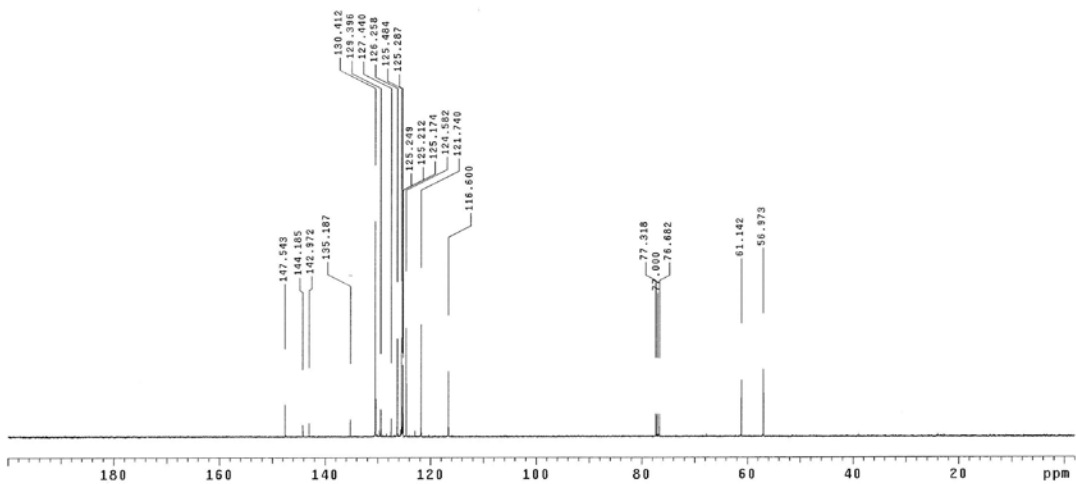



# Compound 8f

SS1051103  
 Pulse Sequence: s2pul  
 UNITYplus-400 "unity400"  
 Date: Nov 3 2016  
 Solvent: CDCl3  
 Ambient temperature  
 Total 32 repetitions

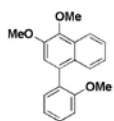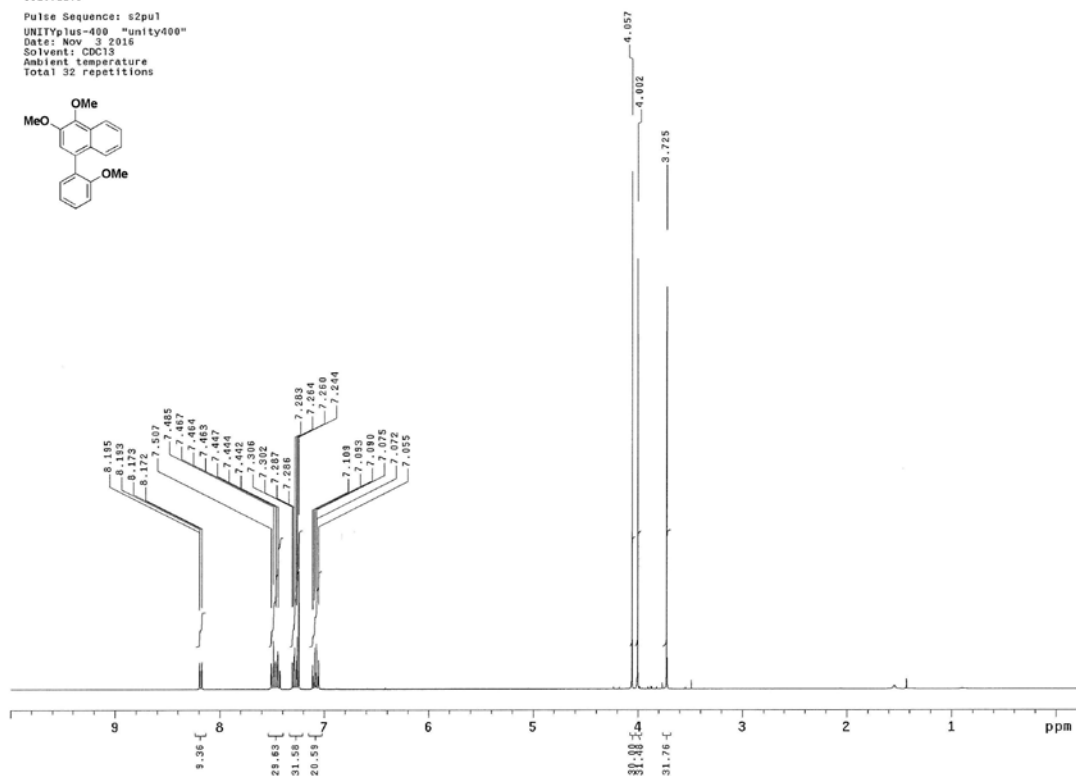

SS1051103  
 Pulse Sequence: s2pul  
 UNITYplus-400 "unity400"  
 Date: Nov 3 2016  
 Solvent: CDCl3  
 Ambient temperature  
 Total 1568 repetitions

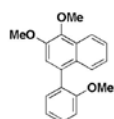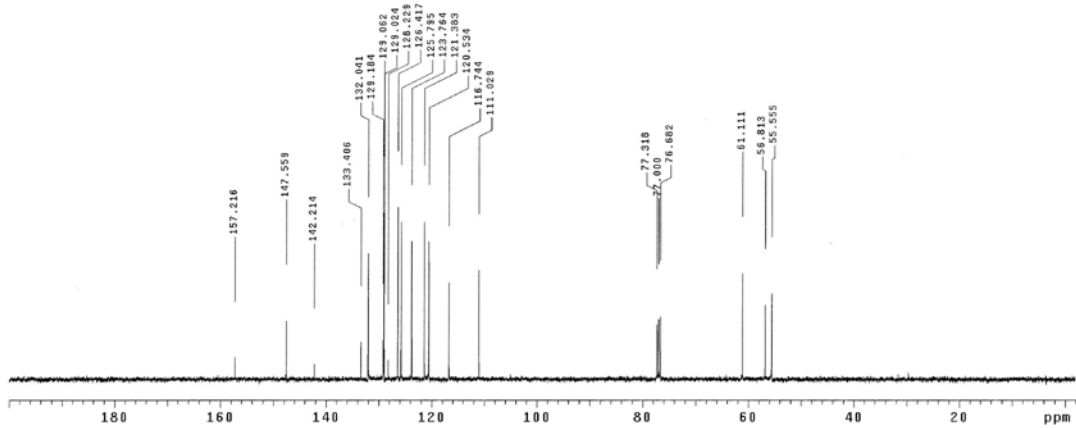

# Compound 8g

SS1051102  
Pulse Sequence: s2pul  
UNITYplus-400 "unity400"  
Date: Nov 2 2016  
Solvent: CDCl3  
Ambient temperature  
Total 32 repetitions

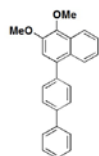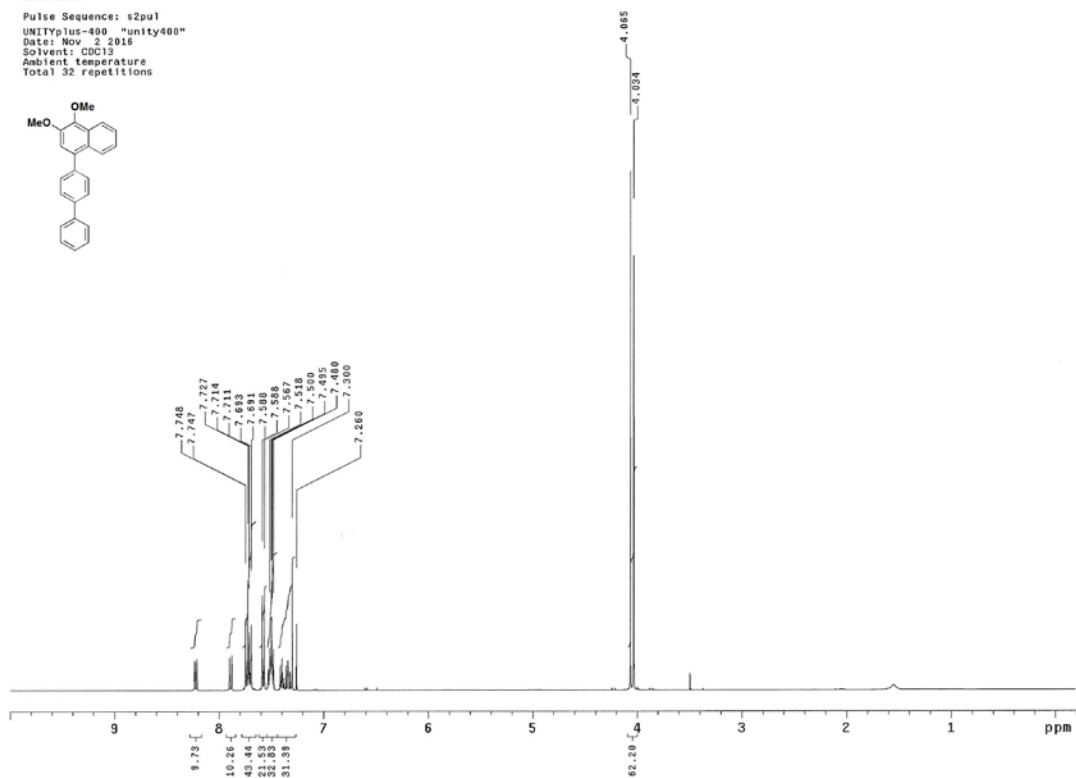

SS1051102  
Pulse Sequence: s2pul  
UNITYplus-400 "unity400"  
Date: Nov 2 2016  
Solvent: CDCl3  
Ambient temperature  
Total 3120 repetitions

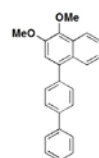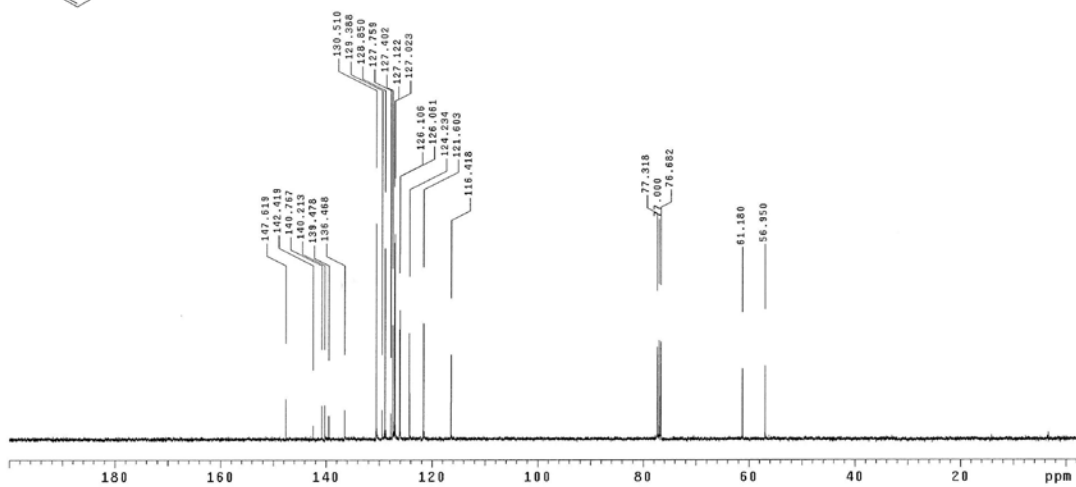

# Compound 9a

MY990505

Mercury-40088 "Mercuryplus400"  
Date: Aug 4 2010  
Solvent: CDCl3  
Ambient temperature  
Total 16 repetitions

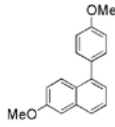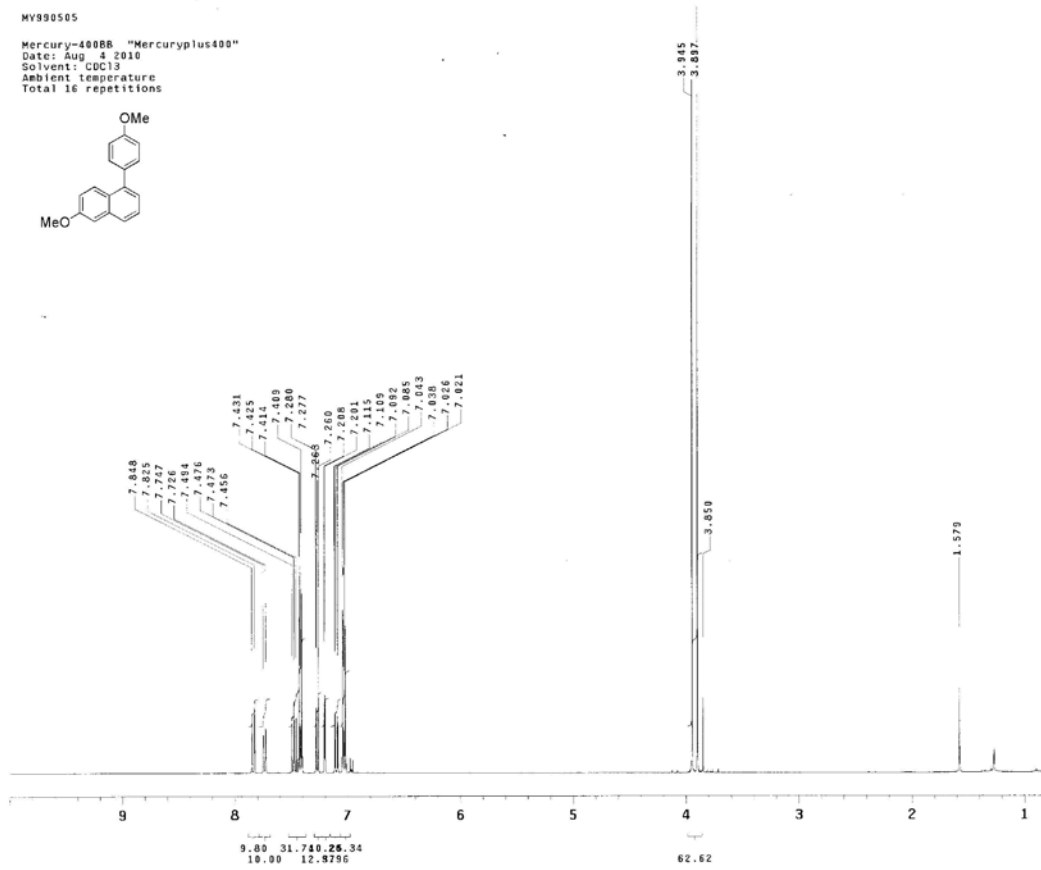

MY990505

Mercury-40088 "Mercuryplus400"  
Date: Aug 4 2010  
Solvent: CDCl3  
Ambient temperature  
Total 32000 repetitions

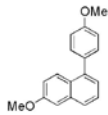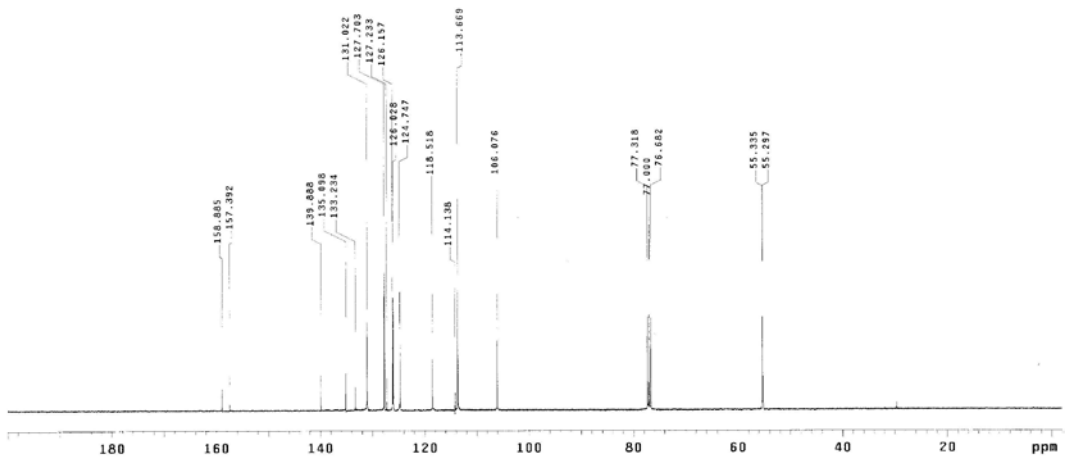

## X-ray crystal data of 5e

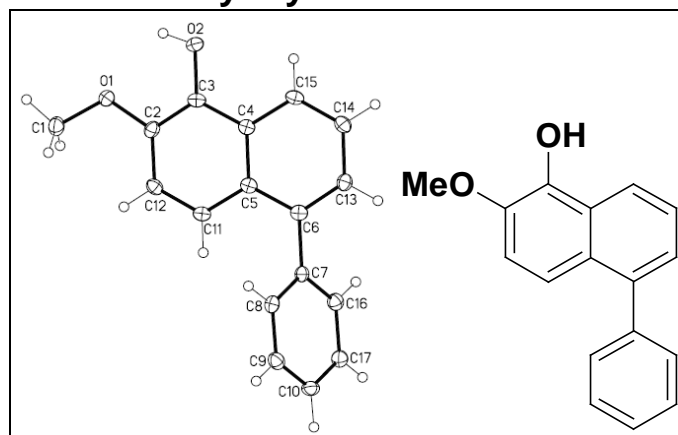

|                                   |                                                   |          |
|-----------------------------------|---------------------------------------------------|----------|
| Empirical formula                 | C <sub>17</sub> H <sub>14</sub> O <sub>2</sub>    |          |
| Formula weight                    | 250.28                                            |          |
| Temperature                       | 100(2) K                                          |          |
| Wavelength                        | 0.71073 Å                                         |          |
| Crystal system                    | Orthorhombic                                      |          |
| Space group                       | F d d 2                                           |          |
| Unit cell dimensions              | a = 13.3885(3) Å                                  | α = 90°. |
|                                   | b = 66.3135(18) Å                                 | β = 90°. |
|                                   | c = 5.5816(2) Å                                   | γ = 90°. |
| Volume                            | 4955.6(2) Å <sup>3</sup>                          |          |
| Z                                 | 16                                                |          |
| Density (calculated)              | 1.342 Mg/m <sup>3</sup>                           |          |
| Absorption coefficient            | 0.087 mm <sup>-1</sup>                            |          |
| F(000)                            | 2112                                              |          |
| Crystal size                      | 0.25 x 0.25 x 0.12 mm <sup>3</sup>                |          |
| Theta range for data collection   | 1.23 to 26.39°.                                   |          |
| Index ranges                      | -10 ≤ h ≤ 16, -82 ≤ k ≤ 82, -6 ≤ l ≤ 6            |          |
| Reflections collected             | 11029                                             |          |
| Independent reflections           | 2518 [R(int) = 0.0603]                            |          |
| Completeness to theta = 26.39°    | 99.9 %                                            |          |
| Absorption correction             | Semi-empirical from equivalents                   |          |
| Max. and min. transmission        | 0.9486 and 0.8690                                 |          |
| Refinement method                 | Full-matrix least-squares on F <sup>2</sup>       |          |
| Data / restraints / parameters    | 2518 / 1 / 174                                    |          |
| Goodness-of-fit on F <sup>2</sup> | 1.168                                             |          |
| Final R indices [I > 2σ(I)]       | R <sub>1</sub> = 0.0325, wR <sub>2</sub> = 0.0807 |          |
| R indices (all data)              | R <sub>1</sub> = 0.0428, wR <sub>2</sub> = 0.1154 |          |
| Absolute structure parameter      | 0.2(13)                                           |          |
| Largest diff. peak and hole       | 0.404 and -0.542 e.Å <sup>-3</sup>                |          |

## X-ray crystal data of 5f

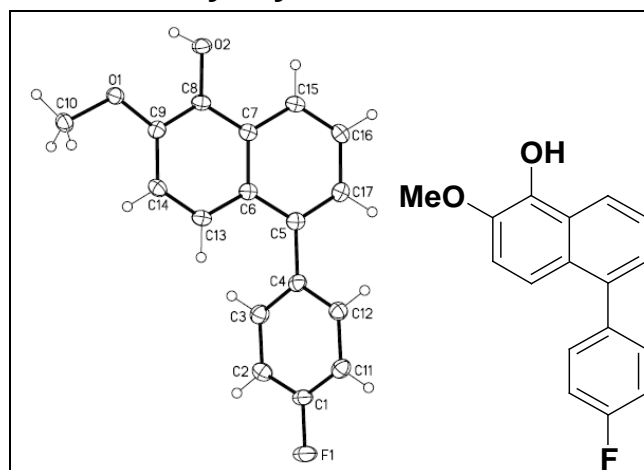

|                                   |                                                  |                 |
|-----------------------------------|--------------------------------------------------|-----------------|
| Empirical formula                 | C <sub>17</sub> H <sub>13</sub> F O <sub>2</sub> |                 |
| Formula weight                    | 268.27                                           |                 |
| Temperature                       | 100(2) K                                         |                 |
| Wavelength                        | 0.71073 Å                                        |                 |
| Crystal system                    | Triclinic                                        |                 |
| Space group                       | P -1                                             |                 |
| Unit cell dimensions              | a = 6.7021(11) Å                                 | α = 85.327(6)°. |
|                                   | b = 7.9371(12) Å                                 | β = 80.530(6)°. |
|                                   | c = 12.170(2) Å                                  | γ = 82.517(6)°. |
| Volume                            | 631.92(18) Å <sup>3</sup>                        |                 |
| Z                                 | 2                                                |                 |
| Density (calculated)              | 1.410 Mg/m <sup>3</sup>                          |                 |
| Absorption coefficient            | 0.101 mm <sup>-1</sup>                           |                 |
| F(000)                            | 280                                              |                 |
| Crystal size                      | 0.18 x 0.10 x 0.10 mm <sup>3</sup>               |                 |
| Theta range for data collection   | 1.70 to 26.38°.                                  |                 |
| Index ranges                      | -8 ≤ h ≤ 7, -9 ≤ k ≤ 7, -15 ≤ l ≤ 15             |                 |
| Reflections collected             | 9259                                             |                 |
| Independent reflections           | 2547 [R(int) = 0.0243]                           |                 |
| Completeness to theta = 26.38°    | 98.6 %                                           |                 |
| Absorption correction             | Semi-empirical from equivalents                  |                 |
| Max. and min. transmission        | 0.9486 and 0.9019                                |                 |
| Refinement method                 | Full-matrix least-squares on F <sup>2</sup>      |                 |
| Data / restraints / parameters    | 2547 / 0 / 183                                   |                 |
| Goodness-of-fit on F <sup>2</sup> | 1.089                                            |                 |
| Final R indices [I > 2σ(I)]       | R1 = 0.0343, wR2 = 0.0907                        |                 |
| R indices (all data)              | R1 = 0.0431, wR2 = 0.1097                        |                 |
| Largest diff. peak and hole       | 0.231 and -0.223 e.Å <sup>-3</sup>               |                 |

## X-ray crystal data of 8d

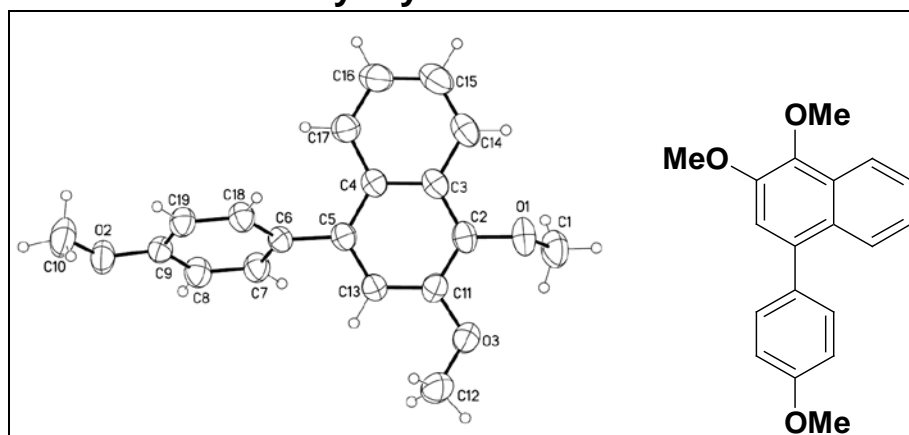

|                                   |                                                   |                 |
|-----------------------------------|---------------------------------------------------|-----------------|
| Empirical formula                 | C <sub>19</sub> H <sub>18</sub> O <sub>3</sub>    |                 |
| Formula weight                    | 294.33                                            |                 |
| Temperature                       | 100(2) K                                          |                 |
| Wavelength                        | 0.71073 Å                                         |                 |
| Crystal system                    | Monoclinic                                        |                 |
| Space group                       | P 2 <sub>1</sub> /c                               |                 |
| Unit cell dimensions              | a = 13.3450(12) Å                                 | α = 90°.        |
|                                   | b = 15.2538(14) Å                                 | β = 99.819(2)°. |
|                                   | c = 7.5723(7) Å                                   | γ = 90°.        |
| Volume                            | 1518.9(2) Å <sup>3</sup>                          |                 |
| Z                                 | 4                                                 |                 |
| Density (calculated)              | 1.287 Mg/m <sup>3</sup>                           |                 |
| Absorption coefficient            | 0.086 mm <sup>-1</sup>                            |                 |
| F(000)                            | 624                                               |                 |
| Crystal size                      | 0.15 x 0.10 x 0.10 mm <sup>3</sup>                |                 |
| Theta range for data collection   | 2.045 to 26.421°.                                 |                 |
| Index ranges                      | -16 ≤ h ≤ 16, -18 ≤ k ≤ 19, -9 ≤ l ≤ 4            |                 |
| Reflections collected             | 12198                                             |                 |
| Independent reflections           | 3116 [R(int) = 0.0580]                            |                 |
| Completeness to theta = 25.242°   | 100.0 %                                           |                 |
| Absorption correction             | Semi-empirical from equivalents                   |                 |
| Max. and min. transmission        | 0.9485 and 0.8689                                 |                 |
| Refinement method                 | Full-matrix least-squares on F <sup>2</sup>       |                 |
| Data / restraints / parameters    | 3116 / 0 / 202                                    |                 |
| Goodness-of-fit on F <sup>2</sup> | 0.996                                             |                 |
| Final R indices [I > 2σ(I)]       | R <sub>1</sub> = 0.0504, wR <sub>2</sub> = 0.1026 |                 |
| R indices (all data)              | R <sub>1</sub> = 0.1172, wR <sub>2</sub> = 0.1285 |                 |
| Extinction coefficient            | n/a                                               |                 |
| Largest diff. peak and hole       | 0.146 and -0.186 e.Å <sup>-3</sup>                |                 |

## X-ray crystal data of 8g

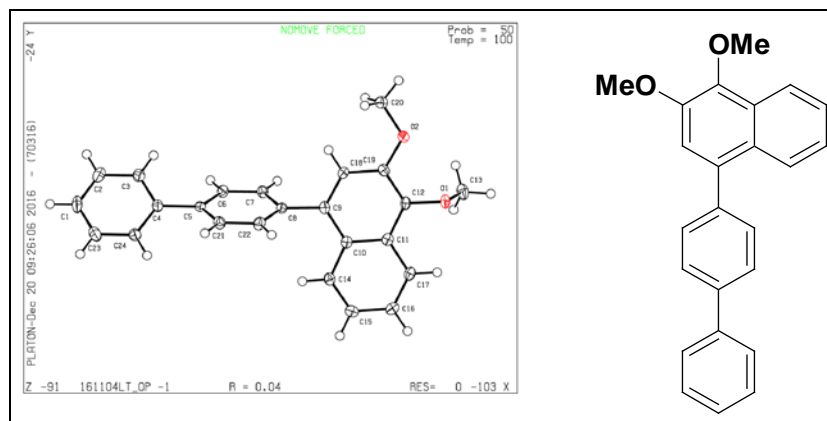

|                                   |                                                |                               |
|-----------------------------------|------------------------------------------------|-------------------------------|
| Empirical formula                 | C <sub>24</sub> H <sub>20</sub> O <sub>2</sub> |                               |
| Formula weight                    | 340.40                                         |                               |
| Temperature                       | 100(2) K                                       |                               |
| Wavelength                        | 0.71073 Å                                      |                               |
| Crystal system                    | Triclinic                                      |                               |
| Space group                       | P -1                                           |                               |
| Unit cell dimensions              | a = 6.6111(3) Å                                | $\alpha = 106.574(2)^\circ$ . |
|                                   | b = 9.8830(5) Å                                | $\beta = 94.682(2)^\circ$ .   |
|                                   | c = 14.4700(8) Å                               | $\gamma = 104.105(2)^\circ$ . |
| Volume                            | 867.14(8) Å <sup>3</sup>                       |                               |
| Z                                 | 2                                              |                               |
| Density (calculated)              | 1.304 Mg/m <sup>3</sup>                        |                               |
| Absorption coefficient            | 0.082 mm <sup>-1</sup>                         |                               |
| F(000)                            | 360                                            |                               |
| Crystal size                      | 0.12 x 0.10 x 0.10 mm <sup>3</sup>             |                               |
| Theta range for data collection   | 1.488 to 26.356°.                              |                               |
| Index ranges                      | -7<=h<=8, -12<=k<=10, -17<=l<=18               |                               |
| Reflections collected             | 11883                                          |                               |
| Independent reflections           | 3534 [R(int) = 0.0262]                         |                               |
| Completeness to theta = 25.242°   | 99.7 %                                         |                               |
| Absorption correction             | Semi-empirical from equivalents                |                               |
| Max. and min. transmission        | 0.9485 and 0.8919                              |                               |
| Refinement method                 | Full-matrix least-squares on F <sup>2</sup>    |                               |
| Data / restraints / parameters    | 3534 / 0 / 237                                 |                               |
| Goodness-of-fit on F <sup>2</sup> | 1.072                                          |                               |
| Final R indices [I>2sigma(I)]     | R1 = 0.0386, wR2 = 0.1084                      |                               |
| R indices (all data)              | R1 = 0.0460, wR2 = 0.1231                      |                               |
| Extinction coefficient            | n/a                                            |                               |
| Largest diff. peak and hole       | 0.231 and -0.211 e.Å <sup>-3</sup>             |                               |

## X-ray crystal data of 9a

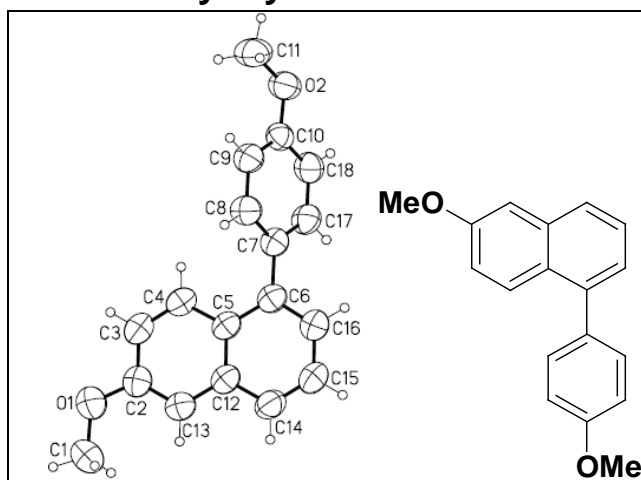

|                                   |                                                   |                 |
|-----------------------------------|---------------------------------------------------|-----------------|
| Empirical formula                 | C <sub>18</sub> H <sub>16</sub> O <sub>2</sub>    |                 |
| Formula weight                    | 264.31                                            |                 |
| Temperature                       | 295(2) K                                          |                 |
| Wavelength                        | 0.71073 Å                                         |                 |
| Crystal system                    | Monoclinic                                        |                 |
| Space group                       | P 1 2 <sub>1</sub> /c 1                           |                 |
| Unit cell dimensions              | a = 7.654(4) Å                                    | α = 90°.        |
|                                   | b = 13.820(8) Å                                   | β = 98.379(9)°. |
|                                   | c = 13.657(8) Å                                   | γ = 90°.        |
| Volume                            | 1429.0(14) Å <sup>3</sup>                         |                 |
| Z                                 | 4                                                 |                 |
| Density (calculated)              | 1.229 Mg/m <sup>3</sup>                           |                 |
| Absorption coefficient            | 0.079 mm <sup>-1</sup>                            |                 |
| F(000)                            | 560                                               |                 |
| Crystal size                      | 0.30 x 0.20 x 0.18 mm <sup>3</sup>                |                 |
| Theta range for data collection   | 2.11 to 26.46°.                                   |                 |
| Index ranges                      | -9 ≤ h ≤ 9, -17 ≤ k ≤ 15, -12 ≤ l ≤ 17            |                 |
| Reflections collected             | 8979                                              |                 |
| Independent reflections           | 2937 [R(int) = 0.0271]                            |                 |
| Completeness to theta = 26.46°    | 99.4 %                                            |                 |
| Absorption correction             | Semi-empirical from equivalents                   |                 |
| Max. and min. transmission        | 0.9486 and 0.8266                                 |                 |
| Refinement method                 | Full-matrix least-squares on F <sup>2</sup>       |                 |
| Data / restraints / parameters    | 2937 / 0 / 183                                    |                 |
| Goodness-of-fit on F <sup>2</sup> | 1.049                                             |                 |
| Final R indices [I > 2σ(I)]       | R <sub>1</sub> = 0.0475, wR <sub>2</sub> = 0.1271 |                 |
| R indices (all data)              | R <sub>1</sub> = 0.0711, wR <sub>2</sub> = 0.1581 |                 |
| Largest diff. peak and hole       | 0.160 and -0.175 e.Å <sup>-3</sup>                |                 |



## X-ray crystal data of 9b

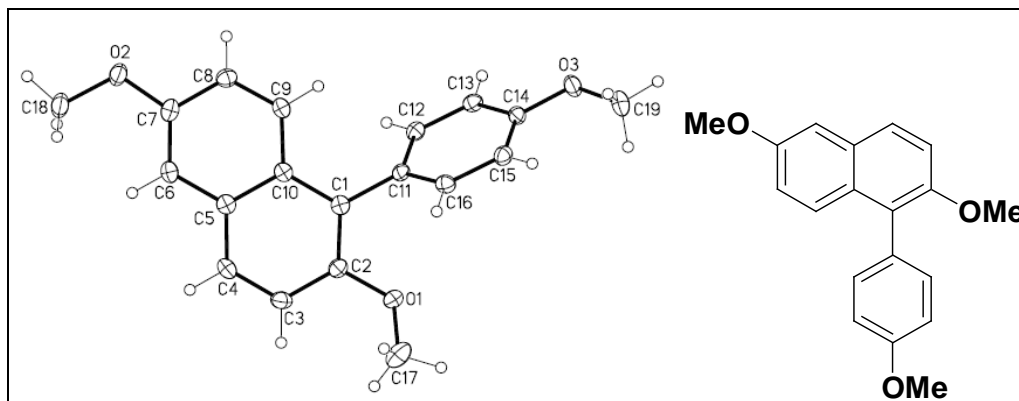

|                                   |                                                |                    |
|-----------------------------------|------------------------------------------------|--------------------|
| Empirical formula                 | C <sub>19</sub> H <sub>18</sub> O <sub>3</sub> |                    |
| Formula weight                    | 294.33                                         |                    |
| Temperature                       | 100(2) K                                       |                    |
| Wavelength                        | 0.71073 Å                                      |                    |
| Crystal system                    | Monoclinic                                     |                    |
| Space group                       | C 1 c 1                                        |                    |
| Unit cell dimensions              | a = 8.6905(3) Å                                | α = 90°.           |
|                                   | b = 21.9250(7) Å                               | β = 108.3260(10)°. |
|                                   | c = 8.2652(3) Å                                | γ = 90°.           |
| Volume                            | 1494.97(9) Å <sup>3</sup>                      |                    |
| Z                                 | 4                                              |                    |
| Density (calculated)              | 1.308 Mg/m <sup>3</sup>                        |                    |
| Absorption coefficient            | 0.088 mm <sup>-1</sup>                         |                    |
| F(000)                            | 624                                            |                    |
| Crystal size                      | 0.30 x 0.25 x 0.25 mm <sup>3</sup>             |                    |
| Theta range for data collection   | 1.86 to 26.52°.                                |                    |
| Index ranges                      | -8 ≤ h ≤ 10, -27 ≤ k ≤ 27, -10 ≤ l ≤ 10        |                    |
| Reflections collected             | 5988                                           |                    |
| Independent reflections           | 2742 [R(int) = 0.0146]                         |                    |
| Completeness to theta = 26.52°    | 99.0 %                                         |                    |
| Absorption correction             | Semi-empirical from equivalents                |                    |
| Max. and min. transmission        | 0.9486 and 0.8716                              |                    |
| Refinement method                 | Full-matrix least-squares on F <sup>2</sup>    |                    |
| Data / restraints / parameters    | 2742 / 2 / 202                                 |                    |
| Goodness-of-fit on F <sup>2</sup> | 1.052                                          |                    |
| Final R indices [I > 2σ(I)]       | R1 = 0.0277, wR2 = 0.0732                      |                    |
| R indices (all data)              | R1 = 0.0291, wR2 = 0.0743                      |                    |
| Absolute structure parameter      | 0.9(7)                                         |                    |
| Largest diff. peak and hole       | 0.194 and -0.156 e.Å <sup>-3</sup>             |                    |
